# Supplementary material for: Design and synthesis of multivalent neoglycoconjugates by click conjugations
Source: publisher site journal article supplement (doi:10.3762/bjoc.10.134), 2014-06-10

# Supporting Information

for

## Design and synthesis of multivalent neoglycoconjugates by click conjugations

Feiqing Ding, Li Ji, Ronny William, Hua Chai, and Xue-Wei Liu \*

Address: Division of Chemistry and Biological Chemistry, School of Physical and  
Mathematical Sciences, Nanyang Technological University, 21 Nanyang Link,  
Singapore 637371

Email: Xue-Wei Liu \* - xuewei@ntu.edu.sg

\* Corresponding author

| <b>Table of Contents</b>                                                                         | <b>Page</b> |
|--------------------------------------------------------------------------------------------------|-------------|
| Experimental                                                                                     | S2          |
| General procedure for the synthesis of propagyl<br>3-tosylamino-2,3-dideoxysugars <b>2a–2d</b>   | S2          |
| Spectroscopic characterization of propagyl<br>3-tosylamino-2,3-dideoxysugars <b>2a–2d</b>        | S3          |
| General procedures for the synthesis of multivalent<br>3-tosylamino-2,3-dideoxynoglycoconjugates | S6          |
| Spectroscopic characterization of multivalent<br>3-tosylamino-2,3-dideoxynoglycoconjugates       | S6          |
| References                                                                                       | S24         |
| NMR spectra for all compounds                                                                    | S26         |

## Experimental

All solvents were distilled under nitrogen from the following drying agents immediately before use: tetrahydrofuran (THF) was distilled from sodium/benzophenone ketyl; dichloromethane and 1,2-dichloroethane were distilled from calcium hydride. Anhydrous acetonitrile (MeCN) was purchased from commercial suppliers and used without further purification.  $\text{BF}_3 \cdot \text{OEt}_2$  was distilled from calcium hydride before use. The compounds **1a**, **1d**, **3a**,  $\text{TsNH}_2$  and propargyl alcohol were purchased from commercial suppliers and used without further purification. The compounds **1b** [1], **1c** [1], **1e** [1], **3a–3h** [2-6], and **5a** and **5b** [7-9] were prepared according to literature reported procedures. All the catalysts and additives were purchased from commercial suppliers and used without further purification. High resolution mass spectra (HRMS) were recorded on a Waters Q-ToF premier<sup>TM</sup> mass spectrometer. Microwave experiments were conducted in a CEM Discover<sup>TM</sup> system.

**General procedure for the synthesis of propargyl 3-tosylamino-2,3-dideoxysugars 2a–2d** [10]. To a solution of glycal **1** (1.0 equiv) and *p*-methylbenzenesulfonamide (1.1 equiv) in DCE (0.1 M) was added propargyl alcohol (1.1 equiv) under  $\text{N}_2$  atmosphere.  $\text{BF}_3 \cdot \text{OEt}_2$  (2.2 equiv) was then added to this mixture. The reaction mixture was stirred for 20 min at room temperature, quenched with saturated  $\text{NaHCO}_3$  and subsequently extracted with  $\text{CH}_2\text{Cl}_2$  (3 × 15 mL). The extract was dried under  $\text{Na}_2\text{SO}_4$  and

concentrated. The residue was subjected to column chromatography (silica gel, hexane/EtOAc) to obtain pure 3-tosylamino-2,3-dideoxysugars **2**.

**Propargyl 3-*p*-toluenesulfonamido-4,6-di-*O*-acetyl-2,3-dideoxy- $\alpha$ -D-allo-hexopyranoside (2a):** Compound **2a** (gummy liquid, 640 mg, 81% yield) was prepared according to the general procedure for the synthesis of propargyl 3-tosylamino-2,3-dideoxysugars from 3,4,6-tri-*O*-acetyl-D-glucal **1a** (500 mg, 1.8 mmol), *p*-methylbenzenesulfonamide (342 mg, 2.0 mmol), and propargyl alcohol (210  $\mu$ L, 2.0 mmol) and purified by column chromatography (hexane/ethyl acetate = 5 : 1);  $^1\text{H}$  NMR ( $\text{CDCl}_3$ , 400MHz):  $\delta$  7.72 (d,  $J$  = 8.0 Hz, 2H), 7.28 (d,  $J$  = 8.0 Hz, 2H), 5.82 (d,  $J$  = 8.8 Hz, 1H), 5.05 (d,  $J$  = 3.2 Hz, 1H), 4.65 (dd,  $J$  = 10.4, 4.0 Hz, 1H), 4.32 (dd,  $J$  = 12.0, 4.4 Hz, 1H), 4.09-4.27 (m, 3H), 3.91 (q,  $J$  = 3.6 Hz, 1H), 3.38-3.40 (m, 1H), 2.46 (s, 1H), 2.42 (s, 3H), 2.08 (s, 3H), 2.04 (s, 3H), 1.87 (dt,  $J$  = 14.8, 4.0 Hz, 1H), 1.50 (dd,  $J$  = 18.4, 2.4 Hz, 1H);  $^{13}\text{C}$  NMR ( $\text{CDCl}_3$ , 100MHz):  $\delta$  170.7, 170.4, 143.4, 137.8, 129.8, 126.9, 95.7, 78.1, 75.5, 66.8, 64.7, 62.6, 54.8, 47.8, 32.7, 21.5, 21.0, 20.8; HRMS (ESI)  $m/z$  [ $\text{M} + \text{Na}$ ] $^+$  calcd for  $\text{C}_{20}\text{H}_{25}\text{NO}_8\text{SNa}$  462.1199, found 462.1201.

**Propargyl 3-*p*-toluenesulfonamido-4,6-di-*O*-acetyl-2,3-dideoxy- $\alpha$ -D-galacto-pyranoside (2b):** Compound **2b** (gummy liquid, 66 mg, 84% yield) was prepared according to the general procedure for the synthesis of propargyl 3-tosylamino-2,3-dideoxysugars from tri-*O*-acetyl-D-galactal **1c** (50 mg, 0.18 mmol), *p*-methylbenzenesulfonamide (34 mg, 0.2 mmol), and propargyl alcohol (21  $\mu$ L, 0.2 mmol) and purified by column chromatography

(hexane/ethyl acetate = 5:1);  $^1\text{H}$  NMR ( $\text{CDCl}_3$ , 400MHz):  $\delta$  7.79 (d,  $J$  = 8.4 Hz, 2H), 7.29 (d,  $J$  = 8.4 Hz, 2H), 5.94 (d,  $J$  = 8.0 Hz, 1H), 5.10 (d,  $J$  = 3.6 Hz, 1H), 4.79 (d,  $J$  = 3.2 Hz, 1H), 4.22-4.32 (m, 3H), 4.00-4.10 (m, 2H), 3.58-3.68 (m, 1H), 2.49 (t,  $J$  = 2.4 Hz, 1H), 2.42 (s, 3H), 2.07 (s, 3H), 2.06 (s, 3H), 2.03 (dt,  $J$  = 14.8, 4.0 Hz, 1H), 1.47 (dd,  $J$  = 14.8, 2.4 Hz, 1H);  $^{13}\text{C}$  NMR ( $\text{CDCl}_3$ , 100MHz):  $\delta$  170.6, 170.4, 143.6, 137.5, 129.8, 127.1, 95.3, 78.3, 75.4, 67.8, 63.5, 62.7, 54.5, 47.4, 28.4, 21.6, 21.5, 20.8; HRMS (ESI)  $m/z$   $[\text{M} + \text{Na}]^+$  calcd for  $\text{C}_{20}\text{H}_{25}\text{NO}_8\text{SNa}$  462.1199, found 462.1195.

**Propargyl 3-*p*-toluenesulfonamido-4-*O*-acetyl-2,3,6-trideoxy- $\alpha$ -L-ribo-hexopyranoside (2c):** Compound **2c** (gummy liquid, 51 mg, 74% yield) was prepared according to the general procedure for the synthesis of propargyl 3-tosylamino-2,3-dideoxysugars from di-*O*-acetyl-D-rhamnal **1d** (39 mg, 0.18 mmol), *p*-methylbenzenesulfonamide (34 mg, 0.2 mmol), and propargyl alcohol (21  $\mu\text{L}$ , 0.2 mmol) and purified by column chromatography (hexane/ethyl acetate = 5:1);  $^1\text{H}$  NMR ( $\text{CDCl}_3$ , 400MHz):  $\delta$  7.72 (d,  $J$  = 8.0 Hz, 2H), 7.29 (d,  $J$  = 8.0 Hz, 2H), 5.84 (d,  $J$  = 8.8 Hz, 1H), 4.97 (d,  $J$  = 3.6 Hz, 1H), 4.35 (dd,  $J$  = 10.0, 4.0 Hz, 1H), 4.24 (t,  $J$  = 2.4 Hz, 2H), 4.02-4.06 (m, 1H), 3.83-3.86 (m, 1H), 2.47 (t,  $J$  = 2.4 Hz, 1H), 2.41 (s, 3H), 2.08 (s, 3H), 1.83 (dt,  $J$  = 15.6, 4.0 Hz, 1H), 1.47 (dd,  $J$  = 14.8, 2.8 Hz, 1H);  $^{13}\text{C}$  NMR ( $\text{CDCl}_3$ , 100MHz):  $\delta$  170.7, 143.2, 138.0, 129.7, 126.9, 95.4, 78.4, 75.2, 72.3, 62.3, 54.5, 47.8, 33.0, 21.5, 21.0, 17.3; HRMS (ESI)  $m/z$   $[\text{M} + \text{Na}]^+$  calcd for  $\text{C}_{18}\text{H}_{23}\text{NO}_6\text{SNa}$  404.1144, found 404.11153.

**Propargyl 3-*p*-toluenesulfonamido-4-(2',3',4',6',-tetra-*O*-acetyl- $\alpha$ -D-glucopyranoside)-6-*O*-acetyl-2,3-dideoxy- $\alpha$ -D-allopyranoside (2d) [10]:**

Compound **2d** (gummy liquid, 88 mg, 67% yield) was prepared according to the general procedure for the synthesis of propargyl 3-tosylamino-2,3-dideoxysugars from hexa-*O*-acetyl-D-maltal **1e** (101 mg, 0.18 mmol), *p*-methylbenzene sulfonamide (34 mg, 0.2 mmol), and propargyl alcohol (21  $\mu$ L, 0.2 mmol) and purified by column chromatography (hexane/ethyl acetate = 5:1); analytical data of **2d** were in all respect identical with the published data [10]:  $^1\text{H}$  NMR ( $\text{CDCl}_3$ , 400MHz):  $\delta$  7.71 (d,  $J$  = 8.0 Hz, 2H), 7.31 (d,  $J$  = 8.0 Hz, 2H), 5.69 (d,  $J$  = 10.0 Hz, 1H), 5.42-5.46 (m, 1H), 5.24 (dd,  $J$  = 10.4, 2.4 Hz, 1H), 5.12 (t,  $J$  = 10.0 Hz, 1H), 4.93 (d,  $J$  = 1.6 Hz, 1H), 4.47 (dd,  $J$  = 12.0, 2.4 Hz, 1H), 4.19-4.33 (m, 3H), 4.09-4.17 (m, 4H), 3.95-3.98 (m, 1H), 3.75 (dd,  $J$  = 9.6, 4.0 Hz, 1H), 2.49 (t,  $J$  = 2.4 Hz, 1H), 2.43 (s, 3H), 2.20 (s, 3H), 2.11 (s, 3H), 2.09 (s, 3H), 2.04 (s, 3H), 2.00 (s, 3H), 1.61 (dt,  $J$  = 14.4, 3.6 Hz, 1H), 1.31 (dd,  $J$  = 14.8, 2.8 Hz, 1H);  $^{13}\text{C}$  NMR ( $\text{CDCl}_3$ , 100 MHz):  $\delta$  170.6, 170.4, 170.3, 170.0, 169.6, 143.6, 138.1, 129.9, 126.8, 95.7, 92.1, 78.2, 75.4, 70.0, 68.6, 68.4, 68.1, 66.1, 62.9, 61.7, 60.4, 54.9, 46.2, 31.5, 21.5, 20.9, 20.8, 20.7, 20.6, 14.2; HRMS (ESI)  $m/z$   $[\text{M} + \text{Na}]^+$  calcd for  $\text{C}_{32}\text{H}_{41}\text{NO}_{16}\text{SNa}$  750.2044, found 750.2042.

**General procedures for the synthesis of multivalent 3-tosylamino-2,3-dideoxyneoglycoconjugates.**

**Method A:** To a propargyl 3-tosylamino-2,3-dideoxysugar **2** (0.05 mmol, 1.0 equiv) and azide **3** (1.5 equiv) in DMF (2 mL) was added CuSO<sub>4</sub>·5H<sub>2</sub>O solution (1 mol %) and sodium ascorbate solution (10 mol %). The reaction mixture was stirred for 12 hours at 70 °C, quenched with water (10 mL) and subsequently extracted with EA (10 mL × 3). The extract was dried and concentrated. The residue was subjected to column chromatography (silica gel, hexane/EtOAc) to obtain pure 3-tosylamino-2,3-dideoxyneoglycoconjugates **4**.

**Method B:** To a 3-amino-2,3-dideoxysugar **4** (0.05 mmol, 1.0 equiv) and azide **5** (1.5 equiv) in DMF (2 mL) was added CuSO<sub>4</sub>·5H<sub>2</sub>O solution (1.0 M) (10 mol %) and sodium ascorbate solution (1.0 M) (10 mol %). The reaction vessel was sealed and irradiated in a microwave reactor (CEM Discover™ system) at a temperature of 70 °C for 15 minutes at a maximum power of 200 W. The reaction mixture was cooled to room temperature and quenched with water (10 mL) and subsequently extracted with EA (10 mL × 3). The extract was dried and concentrated. The residue was subjected to column chromatography (silica gel, hexane/EtOAc) to obtain pure 3-tosylamino-2,3-dideoxyneoglycoconjugates **4**.

**1-Benzyl-4-(3'-*p*-toluenesulfonamido-4',6'-di-*O*-acetyl-2',3'-dideoxy- $\alpha$ -D-allo-pyranosyloxymethyl)-1*H*-1,2,3-triazol (**4a**):** Compound **4a** (gummy liquid, 27 mg, 97% yield) was prepared according to the general procedure

(method A) for the synthesis of multivalent 3-tosylamino-2,3-dideoxyneoglycoconjugates from propargyl 3-tosylamino-2,3-dideoxysugar **2a** (22 mg, 0.05 mmol), benzyl azide **3a** (10 mg, 0.075 mmol), CuSO<sub>4</sub>·5H<sub>2</sub>O solution (5 μL, 1.0 M), and sodium ascorbate solution (5 μL, 1.0 M) in DMF (2 mL). The crude product was purified by column chromatography (hexane/ethyl acetate = 1:1); compound **4a** (28 mg, 98% yield) was also prepared according to the general procedure (method B) for the synthesis of multivalent 3-tosylamino-2,3-dideoxyneoglycoconjugates from propargyl 3-tosylamino-2,3-dideoxysugar **2a** (gummy liquid, 22 mg, 0.05 mmol), benzyl azide (**3a**, 10 mg, 0.075 mmol), CuSO<sub>4</sub>·5H<sub>2</sub>O solution (5 μL, 1.0 M), and sodium ascorbate solution (5 μL, 1.0 M) in DMF (2 mL) under microwave irradiation. The crude product was purified by column chromatography (hexane/ethyl acetate = 1:1); <sup>1</sup>H NMR (CDCl<sub>3</sub>, 400MHz): δ 7.63 (d, *J* = 8.0 Hz, 2H), 7.51 (s, 1H), 7.31-7.41 (m, 5H), 7.24 (d, *J* = 8.4 Hz, 2H), 5.94 (d, *J* = 9.2 Hz, 1H), 5.56 (s, 2H), 4.95 (d, *J* = 7.2 Hz, 1H), 4.81 (d, *J* = 12.4 Hz, 1H), 4.60-4.65 (m, 2H), 4.29 (dd, *J* = 12.0, 4.4 Hz, 1H), 4.11-4.17 (m, 2H), 3.88-3.91 (m, 1H), 2.40 (s, 3H), 2.06 (s, 3H), 2.01 (s, 3H), 1.83 (dt, *J* = 9.6, 3.6 Hz, 1H), 1.51 (dd, *J* = 14.8, 2.4 Hz, 1H); <sup>13</sup>C NMR (CDCl<sub>3</sub>, 400MHz): δ 170.7, 170.3, 143.9, 143.3, 137.9, 134.4, 129.7, 129.3, 128.9, 128.2, 126.9, 122.5, 96.3, 66.9, 64.6, 62.6, 60.7, 54.3, 47.9, 32.8, 21.5, 20.9, 20.8; HRMS (ESI) *m/z* [M + Na]<sup>+</sup> calcd for C<sub>27</sub>H<sub>32</sub>N<sub>4</sub>O<sub>8</sub>SNa 595.1839, found 595.1838.

**1-Benzyl-4-(3'-*p*-toluenesulfonamido-4',6'-di-*O*-acetyl-2',3'-dideoxy- $\alpha$ -D-galactopyranosyloxymethyl)-1*H*-1,2,3-triazol (4b)**: Compound **4b** (gummy liquid, 25 mg, 89% yield) was prepared according to the general procedure (method A) for the synthesis of multivalent 3-tosylamino-2,3-dideoxyneoglyco conjugates from propargyl 3-tosylamino-2,3-dideoxysugar **2b** (22 mg, 0.05 mmol), benzyl azide (**3a**, 10 mg, 0.075 mmol), CuSO<sub>4</sub>·5H<sub>2</sub>O solution (5  $\mu$ L, 1.0 M), and sodium ascorbate solution (5  $\mu$ L, 1.0 M) in DMF (2 mL), which was purified by column chromatography (hexane/ethyl acetate = 1:1); compound **4b** (26 mg, 93% yield) was also prepared according to the general procedure (method B) for the synthesis of multivalent 3-tosylamino-2,3-dideoxyneoglycoconjugates from propargyl 3-tosylamino-2,3-dideoxy sugar **2b** (gummy liquid, 22 mg, 0.05 mmol), benzyl azide (**3a**, 10 mg, 0.075 mmol), CuSO<sub>4</sub>·5H<sub>2</sub>O solution (5  $\mu$ L, 1.0 M), and sodium ascorbate solution (5  $\mu$ L, 1.0 M) in DMF (2 mL) under microwave irradiation. The crude product was purified by column chromatography (hexane/ethyl acetate = 1:1); <sup>1</sup>H NMR (CDCl<sub>3</sub>, 400MHz):  $\delta$  7.73 (d, *J* = 8.4 Hz, 2H), 7.53 (s, 1H), 7.37-7.43 (m, 3H), 7.32 (d, *J* = 6.8 Hz, 2H), 7.28 (d, *J* = 8.0 Hz, 2H), 6.01 (d, *J* = 8.0 Hz, 1H), 5.57 (s, 2H), 5.01 (d, *J* = 3.2 Hz, 1H), 4.82 (d, *J* = 12.4 Hz, 1H), 4.75 (d, *J* = 2.8 Hz, 1H), 4.62 (d, *J* = 12.4 Hz, 1H), 4.30 (t, *J* = 6.0 Hz, 1H), 3.98-4.07 (m, 2H), 3.59-3.60 (m, 1H), 2.41(s, 3H), 2.06 (s, 3H), 2.04 (d, *J* = 4.0 Hz, 1H), 2.01 (s, 3H), 1.47 (d, *J* = 14.8 Hz, 1H); <sup>13</sup>C NMR (CDCl<sub>3</sub>, 400MHz):  $\delta$  170.5, 169.5, 144.1, 143.5, 137.6, 134.4, 129.8, 129.3,



128.9, 128.2, 127.1, 122.5, 96.1, 67.7, 63.4, 62.8, 60.5, 54.3, 47.5, 28.6, 21.6, 20.8, 20.7; HRMS (ESI)  $m/z$   $[M + Na]^+$  calcd for  $C_{27}H_{32}N_4O_8SNa$  595.1839, found 595.1843.

**1-Benzyl-4-(3'-*p*-toluenesulfonamido-4'-*O*-acetyl-2',3',6'-trideoxy- $\alpha$ -L-ribohexopyranosyloxymethyl)-1*H*-1,2,3-triazol (4c):** Compound **4c** (gummy liquid, 17 mg, 74% yield) was prepared according to the general procedure (method A) for the synthesis of multivalent 3-tosylamino-2,3-dideoxyneoglycoconjugates from propargyl 3-tosylamino-2,3-dideoxysugar **2c** (19 mg, 0.05 mmol), benzyl azide (**3a**, 10 mg, 0.075 mmol),  $CuSO_4 \cdot 5H_2O$  solution (5  $\mu$ L, 1.0 M), and sodium ascorbate solution (5  $\mu$ L, 1.0 M) in DMF (2 mL) The crude product was purified by column chromatography (hexane/ethyl acetate = 1:1); compound **4c** (gummy liquid, 21 mg, 81% yield) was also prepared according to the general procedure (method B) for the synthesis of multivalent 3-tosylamino-2,3-dideoxyneoglycoconjugates from propargyl 3-tosylamino-2,3-dideoxy sugar **2c** (19 mg, 0.05 mmol), benzyl azide (**3a**, 10 mg, 0.075 mmol),  $CuSO_4 \cdot 5H_2O$  solution (5  $\mu$ L, 1.0 M), and sodium ascorbate solution (5  $\mu$ L, 1.0 M) in DMF (2 mL) under microwave irradiation The crude product was purified by column chromatography (hexane/ethyl acetate = 1:1);  $^1H$  NMR ( $CDCl_3$ , 400MHz):  $\delta$  7.62 (d,  $J$  = 8.4 Hz, 2H), 7.50 (s,1H), 7.34-7.42 (m, 3H), 7.30-7.33 (m, 2H), 7.23 (d,  $J$  = 8.0 Hz, 2H), 5.95 (d,  $J$  = 9.2 Hz, 1H), 5.55 (s, 2H), 4.86 (d,  $J$ =3.2 Hz, 1H), 4.80 (d,  $J$ = 12.4 Hz, 1H),4.58 (d,  $J$ = 12.4

Hz, 1H), 4.32 (dd,  $J = 10.0, 4.0$  Hz, 1H), 4.02 (dd,  $J = 10.0, 6.0$  Hz, 1H), 3.79-3.84 (m, 1H), 2.39 (s, 3H), 2.02 (s, 3H), 1.77 (dt,  $J = 14.8, 4.0$  Hz, 1H), 1.47 (dd,  $J = 14.8, 2.0$  Hz, 1H), 1.17 (d,  $J = 6.0$  Hz, 3H);  $^{13}\text{C}$  NMR ( $\text{CDCl}_3$ , 400MHz):  $\delta$  170.7, 144.2, 143.2, 138.0, 134.4, 129.7, 129.3, 128.9, 128.2, 126.9, 122.4, 96.2, 72.5, 62.2, 60.6, 54.3, 48.0, 33.1, 21.5, 21.0, 17.4; HRMS (ESI)  $m/z$   $[\text{M} + \text{Na}]^+$  calcd for  $\text{C}_{25}\text{H}_{30}\text{N}_4\text{O}_6\text{SNa}$  537.1784, found 537.1781.

**1-Benzyl-4-(4'-(2'',3'',4'',6''-tetra-O-acetyl- $\alpha$ -D-allopyranoside)-6'-O-acetyl-2',3'-dideoxy- $\alpha$ -D-allopyranosyloxymethyl)-1H-1,2,3-triazol (4d):**

Compound **4d** (gummy liquid, 30 mg, 71% yield) was prepared according to the general procedure (method A) for the synthesis of multivalent 3-tosylamino-2,3-dideoxy neoglycoconjugates from propargyl 3-tosylamino-2,3-dideoxysugar **2d** (36 mg, 0.05 mmol), benzyl azide (**3a**, 10 mg, 0.075 mmol),  $\text{CuSO}_4 \cdot 5\text{H}_2\text{O}$  solution (5  $\mu\text{L}$ , 1.0 M), and sodium ascorbate solution (5  $\mu\text{L}$ , 1.0 M) in DMF (2 mL). The crude product was purified by column chromatography (hexane/ethyl acetate = 1:1); compound **4d** (gummy liquid, 34 mg, 78% yield) was also prepared according to the general procedure (method B) for the synthesis of multivalent 3-tosylamino-2,3-dideoxynoglycoconjugates from propargyl 3-tosylamino-2,3-dideoxysugar **2d** (36 mg, 0.05 mmol), benzyl azide **3a** (10 mg, 0.075 mmol),  $\text{CuSO}_4 \cdot 5\text{H}_2\text{O}$  solution (5  $\mu\text{L}$ , 1.0 M), and sodium ascorbate solution (5  $\mu\text{L}$ , 1.0 M) in DMF (2 mL) under microwave irradiation. The crude product was purified by column chromatography (hexane/ethyl acetate = 1:1);

<sup>1</sup>H NMR (CDCl<sub>3</sub>, 400MHz): δ 7.64-7.69 (m, 1H), 7.56 (d, *J* = 8.0 Hz, 2H), 7.46-7.50 (m, 2H), 7.37-7.41 (m, 1H), 7.32-7.34 (m, 2H), 7.21 (d, *J* = 8.4 Hz, 2H), 5.77 (d, *J* = 9.6 Hz, 1H), 5.58 (s, 2H), 5.44 (d, *J* = 10.0 Hz, 1H), 5.40 (d, *J* = 4.0 Hz, 1H), 5.24 (dd, *J* = 10.4, 3.6 Hz, 1H), 5.11 (t, *J* = 9.6 Hz, 1H), 4.86 (s, 1H), 4.78 (d, *J* = 12.4 Hz, 1H), 4.55 (d, *J* = 12.0 Hz, 1H), 4.44 (dd, *J* = 12.0, 2.8 Hz, 1H), 4.28 (dd, *J* = 12.0, 4.4 Hz, 1H), 4.21 (dd, *J* = 12.4, 4.0 Hz, 1H), 4.09-4.13 (m, 3H), 3.96 (d, *J* = 10.0 Hz, 1H), 3.84-3.88 (m, 1H), 3.72 (dd, *J* = 9.6, 4.0 Hz, 1H), 2.40 (s, 3H), 2.19 (s, 3H), 2.10 (s, 3H), 2.07 (s, 3H), 2.04 (s, 3H), 2.00 (s, 3H), 1.52-1.56 (m, 1H), 1.32-1.36 (m, 1H); <sup>13</sup>C NMR (CDCl<sub>3</sub>, 400MHz): δ 170.6, 170.4, 170.3, 170.0, 169.5, 143.9, 143.5, 138.0, 134.4, 132.1, 131.9, 129.9, 129.3, 128.2, 126.7, 122.5, 96.5, 92.0, 70.0, 68.7, 68.4, 68.1, 65.9, 62.9, 61.7, 61.1, 54.3, 46.2, 31.5, 21.5, 21.0, 20.8, 20.7, 20.6, 14.2; HRMS (ESI) *m/z* [M + Na]<sup>+</sup> calcd for C<sub>39</sub>H<sub>48</sub>N<sub>4</sub>O<sub>16</sub>SNa 883.2684, found 883.2686.

**1-Cinnamyl-4-(3'-*p*-toluenesulfonamido-4',6'-di-*O*-acetyl-2',3'-dideoxy- $\alpha$ -D-allopyranosyloxymethyl)-1*H*-1,2,3-triazol (4e):** Compound **4e** (gummy liquid, 24 mg, 82% yield) was prepared according to the general procedure (method A) for the synthesis of multivalent 3-tosylamino-2,3-dideoxyneoglycoconjugates from propargyl 3-tosylamino-2,3-dideoxysugar **2a** (22 mg, 0.05 mmol), cinnamyl azide (**3b**, 12 mg, 0.075 mmol), CuSO<sub>4</sub>·5H<sub>2</sub>O solution (5  $\mu$ L, 1.0 M), and sodium ascorbate solution (5  $\mu$ L, 1.0 M) in DMF (2 mL). The crude product was purified by

column chromatography (hexane/ethyl acetate = 1:1); compound **4e** (gummy liquid, 26 mg, 85% yield) was also prepared according to the general procedure (method B) for the synthesis of multivalent 3-tosylamino-2,3-dideoxyneoglycoconjugates from propargyl 3-tosylamino-2,3-dideoxy sugar **2a** (22 mg, 0.05 mmol), cinnamyl azide (**3b**, 12 mg, 0.075 mmol), CuSO<sub>4</sub>·5H<sub>2</sub>O solution (5 μL, 1.0 M), and sodium ascorbate solution (5 μL, 1.0 M) in DMF (2 mL) under microwave irradiation. The crude product was purified by column chromatography (hexane/ethyl acetate = 1:1); <sup>1</sup>H NMR (CDCl<sub>3</sub>, 400MHz): δ 7.64 (d, *J* = 10.4 Hz, 3H), 7.41 (d, *J* = 7.2 Hz, 2H), 7.26-7.35 (m, 3H), 7.21 (d, *J* = 8.4 Hz, 2H), 6.73 (d, *J* = 16.0 Hz, 1H), 6.38 (dt, *J* = 16.0, 6.8 Hz, 1H), 5.96 (d, *J* = 8.8 Hz, 1H), 5.17 (d, *J* = 6.8 Hz, 2H), 4.97 (d, *J* = 3.2 Hz, 1H), 4.84 (d, *J* = 12.4, 1H), 4.61-4.66 (m, 2H), 4.30 (dd, *J* = 12.4, 4.8 Hz, 1H), 4.18 (d, *J* = 10.4 Hz, 2H), 3.88-3.91 (m, 1H), 2.37 (s, 3H), 2.06 (s, 3H), 2.00 (s, 3H), 1.83 (dt, *J* = 14.8, 4.0 Hz, 1H), 1.53 (dd, *J* = 14.8, 2.4 Hz, 1H); <sup>13</sup>C NMR (CDCl<sub>3</sub>, 400MHz): δ 170.7, 170.4, 143.8, 143.3, 137.8, 136.0, 135.4, 129.7, 128.8, 128.7, 126.9, 126.8, 122.4, 121.5, 96.3, 66.9, 64.6, 62.6, 60.7, 52.5, 47.9, 32.9, 21.5, 20.9, 20.8; HRMS (ESI) *m/z* [M + Na]<sup>+</sup> calcd for C<sub>29</sub>H<sub>34</sub>N<sub>4</sub>O<sub>8</sub>SNa 621.1995, found 621.1994.

**1-tert-Butylacetyl-4-(3'-*p*-toluenesulfonamido-4',6'-di-*O*-acetyl-2',3'-dideoxy- $\alpha$ -D-allopyranosyloxymethyl)-1*H*-1,2,3-triazol (4f):** Compound **4f** (gummy liquid, 27 mg, 91% yield) was prepared according to the general procedure (method A) for the synthesis of multivalent

3-tosylamino-2,3-dideoxyneoglycoconjugates from propargyl 3-tosylamino-2,3-dideoxysugar **2a** (22 mg, 0.05 mmol), azide **3c** (8 mg, 0.075 mmol), CuSO<sub>4</sub>·5H<sub>2</sub>O solution (5 μL, 1.0 M), and sodium ascorbate solution (5 μL, 1.0 M) in DMF (2 mL). The crude product was purified by column chromatography (hexane/ethyl acetate = 1:1); compound **4f** (gummy liquid, 28 mg, 92% yield) was also prepared according to the general procedure (method B) for the synthesis of multivalent 3-tosylamino-2,3-dideoxyneoglycoconjugates from propargyl 3-tosylamino-2,3-dideoxysugar **2a** (22 mg, 0.05 mmol), azide **3c** (8 mg, 0.075 mmol), CuSO<sub>4</sub>·5H<sub>2</sub>O solution (5 μL, 1.0 M), and sodium ascorbate solution (5 μL, 1.0 M) in DMF (2 mL) under microwave irradiation. The crude product was purified by column chromatography (hexane/ethyl acetate = 1:1); <sup>1</sup>H NMR (CDCl<sub>3</sub>, 400MHz): δ 7.72 (s, 1H), 7.66 (d, *J* = 8.0 Hz, 2H), 7.25 (d, *J* = 8.0 Hz, 2H), 5.96 (d, *J* = 8.8 Hz, 1H), 5.08 (s, 2H), 4.96 (d, *J* = 3.2 Hz, 1H), 4.84 (d, *J* = 12.4 Hz, 1H), 4.67 (d, *J* = 12.4 Hz, 1H), 4.63 (dd, *J* = 10.0, 4.0 Hz, 1H), 4.29 (dd, *J* = 12.4, 4.8 Hz, 1H), 4.17 (d, *J* = 10.4 Hz, 2H), 3.87-3.90 (m, 1H), 2.39 (s, 3H), 2.06 (s, 3H), 2.01 (s, 3H), 1.82 (dt, *J* = 14.4, 4.0 Hz, 1H), 1.52 (d, *J* = 2.4 Hz, 1H), 1.49 (s, 9H); <sup>13</sup>C NMR (CDCl<sub>3</sub>, 400MHz): δ 170.7, 170.4, 165.2, 143.7, 143.3, 137.9, 129.8, 126.9, 124.2, 96.2, 84.0, 67.0, 64.6, 62.7, 60.6, 51.5, 47.9, 32.8, 28.0, 21.5, 20.9, 20.8; HRMS (ESI) *m/z* [M + Na]<sup>+</sup> calcd for C<sub>26</sub>H<sub>36</sub>N<sub>4</sub>O<sub>10</sub>SNa 619.2050, found 619.2053.

**1-(Hept-6'-en-1-yl)-4-(3''-*p*-toluenesulfonamido-4'',6''-di-*O*-acetyl-2'',3''-di deoxy- $\alpha$ -D-allopyranosyloxymethyl)-1*H*-1,2,3-triazol (**4g**):** Compound **4g**

(gummy liquid, 25 mg, 86% yield) was prepared according to the general procedure (method A) for the synthesis of multivalent 3-tosylamino-2,3-dideoxyneoglyco conjugates from propargyl 3-tosylamino-2,3-dideoxysugar **2a** (22 mg, 0.05 mmol), azide **3d** (11 mg, 0.075 mmol), CuSO<sub>4</sub>·5H<sub>2</sub>O solution (5 μL, 1.0 M), and sodium ascorbate solution (5 μL, 1.0 M) in DMF (2 mL). The crude product was purified by column chromatography (hexane/ethyl acetate = 1:1); compound **4g** (gummy liquid, 26 mg, 89% yield) was also prepared according to the general procedure (method B) for the synthesis of multivalent 3-tosylamino-2,3-dideoxyneoglycoconjugates from propargyl 3-tosylamino-2,3-dideoxysugar **2a** (22 mg, 0.05 mmol), azide **3d** (11 mg, 0.075 mmol), CuSO<sub>4</sub>·5H<sub>2</sub>O solution (5 μL, 1.0 M), and sodium ascorbate solution (5 μL, 1.0 M) in DMF (2 mL) under microwave irradiation. The crude product was purified by column chromatography (hexane/ethyl acetate = 1:1); <sup>1</sup>H NMR (CDCl<sub>3</sub>, 400MHz): δ 7.66 (d, *J* = 8.4 Hz, 2H), 7.57 (s, 1H), 7.27 (d, *J* = 6.8 Hz, 2H), 5.97 (d, *J* = 8.8 Hz, 1H), 5.76-5.79 (m, 1H), 4.93-5.01 (m, 3H), 4.84 (d, *J* = 12.4 Hz, 1H), 4.65 (d, *J* = 12.4 Hz, 2H), 4.38 (t, *J* = 7.2 Hz, 2H), 4.32 (dd, *J* = 12.0, 4.8 Hz, 1H), 4.19 (d, *J* = 11.2 Hz, 2H), 3.88-3.92 (m, 1H), 2.40 (s, 3H), 2.07 (s, 3H), 2.03-2.05 (m, 2H), 2.01 (s, 3H), 1.95 (t, *J* = 7.2 Hz, 2H), 1.85 (dt, *J* = 14.4, 4.0 Hz, 1H), 1.24-1.48 (m, 5H); <sup>13</sup>C NMR (CDCl<sub>3</sub>, 400MHz): δ 170.7, 170.4, 143.4, 143.3, 138.3, 137.8, 129.8, 126.9, 122.4, 114.8, 96.3, 67.0, 64.6,

62.7, 60.7, 50.5, 48.0, 33.4, 32.9, 30.1, 28.2, 25.9, 21.5, 20.9, 20.8; HRMS (ESI)  $m/z$   $[M + Na]^+$  calcd for  $C_{27}H_{38}N_4O_8SNa$  601.2308, found 601.2308.

**1-(6'-Acetylthiohexyl)-4-(3''-p-toluenesulfonamido-4'',6''-di-O-acetyl-2'', 3''-dideoxy- $\alpha$ -D-allopyranosyloxymethyl)-1H-1,2,3-triazol (4h):** Compound **4h** (gummy liquid, 28 mg, 87% yield) was prepared according to the general procedure (method A) for the synthesis of multivalent 3-tosylamino-2,3-dideoxyneoglycoconjugates from propargyl 3-tosylamino-2,3-dideoxysugar **2a** (22 mg, 0.05 mmol), azide **3e** (10 mg, 0.075 mmol),  $CuSO_4 \cdot 5H_2O$  solution (5  $\mu$ L, 1.0 M), and sodium ascorbate solution (5  $\mu$ L, 1.0 M) in DMF (2 mL). The crude product was purified by column chromatography (hexane/ethyl acetate = 1:1); compound **4h** (gummy liquid, 30 mg, 92% yield) was also prepared according to the general procedure (method B) for the synthesis of multivalent 3-tosylamino-2,3-dideoxyneoglycoconjugates from propargyl 3-tosylamino-2,3-dideoxysugar **2a** (22 mg, 0.05 mmol), azide **3e** (10 mg, 0.075 mmol),  $CuSO_4 \cdot 5H_2O$  solution (5  $\mu$ L, 1.0 M), and sodium ascorbate solution (5  $\mu$ L, 1.0 M) in DMF (2 mL) under microwave irradiation. The crude product was purified by column chromatography (hexane/ethyl acetate = 1:1);  $^1H$  NMR ( $CDCl_3$ , 400MHz):  $\delta$  7.65 (d,  $J = 8.4$  Hz, 2H), 7.58 (s, 1H), 7.27 (d,  $J = 8.0$  Hz, 2H), 5.97 (d,  $J = 8.8$  Hz, 1H), 5.75-5.81 (m, 1H), 4.93-5.01 (m, 3H), 4.84 (d,  $J = 12.4$  Hz, 1H), 4.62-4.65 (m, 2H), 4.38 (t,  $J = 7.2$  Hz, 2H), 4.30 (dd,  $J = 12.0, 4.8$  Hz, 1H), 4.17-4.20 (m, 1H), 3.88-3.91 (m, 1H), 2.40 (s, 3H), 2.07 (s, 3H), 2.03

(s, 3H), 1.99 (s, 3H), 1.95 (t,  $J = 7.2$  Hz, 2H), 1.85 (dt,  $J = 14.4, 4.0$  Hz, 1H), 1.54-1.64 (m, 3H), 1.38-1.40 (m, 4H);  $^{13}\text{C}$  NMR ( $\text{CDCl}_3$ , 400MHz):  $\delta$  171.2, 170.7, 170.3, 143.5, 143.4, 137.8, 129.8, 126.9, 122.4, 96.3, 67.0, 64.6, 64.2, 62.6, 60.7, 50.4, 48.0, 32.9, 30.2, 28.4, 26.1, 25.4, 21.5, 21.0, 20.9, 20.8; HRMS (ESI)  $m/z$   $[\text{M} + \text{Na}]^+$  calcd for  $\text{C}_{28}\text{H}_{40}\text{N}_4\text{O}_9\text{S}_2\text{Na}$  663.2134, found 663.2130.

**1-(2',3',4',6'-Tetra-O-acetyl- $\alpha$ -D-allopyranosyl)-4-(3''-*p*-tosamido-4'',6''-di-O-acetyl-2'',3''-dideoxy- $\alpha$ -D-allopyranosyloxymethyl)-1*H*-1,2,3-triazol (4i):**

Compound **4i** (gummy liquid, 31 mg, 76% yield) was prepared according to the general procedure (method A) for the synthesis of multivalent 3-tosylamino-2,3-dideoxyneoglycoconjugates from propargyl 3-tosylamino-2,3-dideoxysugar **2a** (22 mg, 0.05 mmol), azide **3f** (28 mg, 0.075 mmol),  $\text{CuSO}_4 \cdot 5\text{H}_2\text{O}$  solution (5  $\mu\text{L}$ , 1.0 M), and sodium ascorbate solution (5  $\mu\text{L}$ , 1.0 M) in DMF (2 mL). The crude product was purified by column chromatography (hexane/ethyl acetate = 1:1); compound **4i** (gummy liquid, 33 mg, 80% yield) was also prepared according to the general procedure (method B) for the synthesis of multivalent 3-tosylamino-2,3-dideoxyneoglycoconjugates from propargyl 3-tosylamino-2,3-dideoxysugar **2a** (22 mg, 0.05 mmol), azide **3f** (28 mg, 0.075 mmol),  $\text{CuSO}_4 \cdot 5\text{H}_2\text{O}$  solution (5  $\mu\text{L}$ , 1.0 M), and sodium ascorbate solution (5  $\mu\text{L}$ , 1.0 M) in DMF (2 mL) under microwave irradiation. The crude product was purified by column chromatography (hexane/ethyl acetate = 1:1);  $^1\text{H}$  NMR



(CDCl<sub>3</sub>, 400MHz):  $\delta$  7.84 (s, 1H), 7.70 (d,  $J$  = 8.4 Hz, 2H), 7.28 (d,  $J$  = 8.4 Hz, 2H), 5.92 (dd,  $J$  = 13.6, 9.2 Hz, 2H), 5.40-5.48 (m, 2H), 5.27 (t,  $J$  = 9.6 Hz, 1H), 4.92 (d,  $J$  = 3.2 Hz, 1H), 4.85 (d,  $J$  = 12.4 Hz, 1H), 4.66 (d,  $J$  = 12.4 Hz, 2H), 4.31-4.38 (m, 2H), 4.16-4.21 (m, 3H), 4.02-4.04 (m, 1H), 3.90-3.92 (m, 1H), 2.41 (s, 3H), 2.07-2.09 (m, 9H), 2.03-2.05 (m, 9H), 1.85 (dt,  $J$  = 14.8, 4.0 Hz, 1H), 1.53 (dd,  $J$  = 10.4, 2.4 Hz, 1H); <sup>13</sup>C NMR (CDCl<sub>3</sub>, 400MHz):  $\delta$  170.7, 170.5, 170.3, 169.9, 169.4, 169.0, 144.1, 143.3, 138.0, 129.7, 126.9, 121.2, 96.1, 85.9, 75.3, 72.4, 70.4, 67.7, 66.9, 64.6, 62.7, 61.5, 60.2, 47.9, 32.8, 21.5, 20.9, 20.8, 20.7, 20.5, 20.2, 14.2; HRMS (ESI)  $m/z$  [M + Na]<sup>+</sup> calcd for C<sub>34</sub>H<sub>44</sub>N<sub>4</sub>O<sub>17</sub>SNa 835.2320, found 835.2314.

**1-(2'-*N*-Acetyl-3',4',6'-tri-*O*-acetyl- $\alpha$ -D-allopyranosyl)-4-(3''-*p*-toluenesulfonylamido-4'',6''-di-*O*-acetyl-2'',3''-dideoxy- $\alpha$ -D-allopyranosyloxymethyl)-**

**1*H*-1,2,3-triazol (4j)**: Compound **4j** (gummy liquid, 38 mg, 93% yield) was prepared according to the general procedure (method A) for the synthesis of multivalent 3-tosylamino-2,3-dideoxyneoglycoconjugates from propargyl 3-tosylamino-2,3-dideoxysugar **2a** (22 mg, 0.05 mmol), azide **3g** (28 mg, 0.075 mmol), CuSO<sub>4</sub>·5H<sub>2</sub>O solution (5  $\mu$ L, 1.0 M), and sodium ascorbate solution (5  $\mu$ L, 1.0 M) in DMF (2 mL). The crude product was purified by column chromatography (hexane/ethyl acetate = 1:1); compound **4j** (gummy liquid, 39 mg, 95% yield) was also prepared according to the general procedure (method B) for the synthesis of multivalent 3-tosylamino-2,3-dideoxyneoglycoconjugates from propargyl

3-tosylamino-2,3-dideoxysugar **2a** (22 mg, 0.05 mmol), azide **3g** (28 mg, 0.075 mmol), CuSO<sub>4</sub>·5H<sub>2</sub>O solution (5 μL, 1.0 M), and sodium ascorbate solution (5 μL, 1.0 M) in DMF (2 mL) under microwave irradiation. The crude product was purified by column chromatography (hexane/ethyl acetate = 1:1); <sup>1</sup>H NMR (CDCl<sub>3</sub>, 400MHz): δ 7.89 (d, *J* = 28.4 Hz, 1H), 5.58 (d, *J* = 8.0 Hz, 2H), 7.21 (d, *J* = 8.4 Hz, 2H), 6.99 (d, *J* = 8.8 Hz, 1H), 6.72 (d, *J* = 9.2 Hz, 1H), 6.14 (d, *J* = 10.0 Hz, 1H), 5.98 (d, *J* = 9.2 Hz, 1H), 5.51 (t, *J* = 10.4 Hz, 1H), 5.24 (t, *J* = 10.0 Hz, 1H), 5.16 (t, *J* = 9.6 Hz, 1H), 5.01 (t, *J* = 9.6 Hz, 1H), 4.86 (d, *J* = 2.8 Hz, 1H), 4.81 (d, *J* = 9.6 Hz, 1H), 4.76 (d, *J* = 12.4 Hz, 1H), 4.54-4.59 (m, 2H), 4.17-4.29 (m, 1H), 4.05-4.14 (m, 2H), 3.78-3.90 (m, 1H), 2.33 (s, 3H), 1.88-2.01 (m, 18H), 1.70-1.80 (m, 1H), 1.40-1.50 (m, 1H); <sup>13</sup>C NMR (CDCl<sub>3</sub>, 400MHz): δ 171.2, 170.8, 170.6, 170.4, 170.3, 169.4, 162.7, 143.7, 137.8, 129.8, 126.8, 121.8, 96.0, 88.3, 85.7, 74.7, 72.2, 68.4, 67.0, 64.6, 62.6, 61.9, 60.3, 53.9, 48.0, 36.5, 32.6, 22.7, 21.4, 20.8, 20.4, 14.1; HRMS (ESI) *m/z* [M + Na]<sup>+</sup> calcd for C<sub>34</sub>H<sub>45</sub>N<sub>5</sub>O<sub>16</sub>SNa 834.2480, found 834.2484.

**1-(2'-*N*-Acetyl-3',4',6'-tri-*O*-acetyl- $\alpha$ -D-glucopyranosyl)-4-(4'-(2'',3'',4'',6''-tetra-*O*-acetyl- $\alpha$ -D-glucopyranoside)-6'-*O*-acetyl-2',3'-dideoxy- $\alpha$ -D-allopyranosyloxymethyl)-1*H*-1,2,3-triazol (**4k**):** Compound **4k** (gummy liquid, 44 mg, 80% yield) was prepared according to the general procedure (method A) for the synthesis of multivalent 3-tosylamino-2,3-dideoxyneoglycoconjugates from propargyl 3-tosylamino-2,3-dideoxysugar **2d** (36 mg, 0.05 mmol), benzyl azide **3g** (28 mg, 0.075 mmol), CuSO<sub>4</sub>·5H<sub>2</sub>O solution (5 μL, 1.0 M), and

sodium ascorbate solution (5  $\mu$ L, 1.0 M) in DMF (2 mL). The crude product was purified by column chromatography (hexane/ethyl acetate = 1:1); compound **4k** (gummy liquid, 45 mg, 82% yield) was also prepared according to the general procedure (method B) for the synthesis of multivalent 3-tosylamino-2,3-dideoxyneoglycoconjugates from propargyl 3-tosylamino-2,3-dideoxysugar **2d** (36 mg, 0.05 mmol), azide **3g** (28 mg, 0.075 mmol), CuSO<sub>4</sub>·5H<sub>2</sub>O solution (5  $\mu$ L, 1.0 M), and sodium ascorbate solution (5  $\mu$ L, 1.0 M) in DMF (2 mL) under microwave irradiation. The crude product was purified by column chromatography (hexane/ethyl acetate = 1:1); <sup>1</sup>H NMR (CDCl<sub>3</sub>, 400MHz):  $\delta$  7.95 (s, 1H), 7.53(d, *J* = 8.4 Hz, 2H), 7.27 (d, *J* = 9.6 Hz, 2H), 6.40 (d, *J* = 8.4 Hz, 1H), 6.31 (d, *J* = 10.0 Hz, 1H), 5.95 (d, *J* = 10.0 Hz, 1H), 5.62 (d, *J* = 9.2 Hz, 1H), 5.43 (dd, *J* = 10.0, 9.2 Hz, 1H), 5.37 (d, *J* = 3.6 Hz, 1H), 5.19-5.28 (m, 2H), 5.06-5.13 (m, 1H), 4.86 (s, 1H), 4.76-4.82 (m, 2H), 4.58 (d, *J* = 12.0 Hz, 1H), 4.50 (dd, *J* = 12.0, 2.8 Hz, 1H), 4.07-4.28 (m, 8H), 3.90-3.97 (m, 1H), 3.78-3.88 (m, 1H), 3.74 (dd, *J* = 10.4, 3.6 Hz, 1H), 2.41 (s, 3H), 2.14 (s, 3H), 1.96-2.10 (m, 25H), 1.49-1.54 (m, 1H); <sup>13</sup>C NMR (CDCl<sub>3</sub>, 400MHz):  $\delta$  171.0, 170.6, 170.5, 170.4, 170.3, 170.0, 169.5, 169.4, 169.3, 144.1, 143.7, 137.9, 130.0, 126.7, 121.4, 96.4, 88.4, 85.6, 75.0, 73.9, 72.2, 71.6, 69.9, 68.7, 68.4, 68.1, 65.7, 63.1, 61.8, 60.5, 60.4, 54.7, 54.1, 46.2, 31.3, 23.2, 22.8, 21.5, 21.1, 20.9, 20.7, 20.6, 20.5, 20.4; HRMS (ESI) *m/z* [M + Na]<sup>+</sup> calcd for C<sub>46</sub>H<sub>61</sub>N<sub>5</sub>O<sub>24</sub>SNa 1122.3325, found 1122.3322.

**1-(2',2',7',7'-Tetramethyltetrahydro-bis([1,3]dioxolo)pyranylmethyl)-4-(3''-*p*-toluenesulfonamido-4'',6''-di-*O*-acetyl-2'',3''-dideoxy- $\alpha$ -D-allo-pyransyloxymethyl)-1*H*-1,2,3-triazol (4I)**: Compound **4I** (gummy liquid, 26 mg, 72% yield) was prepared according to the general procedure (method A) for the synthesis of multivalent 3-tosylamino-2,3-dideoxyneoglycoconjugates from propargyl 3-tosylamino-2,3-dideoxysugar **2a** (22 mg, 0.05 mmol), azide **3h** (22 mg, 0.075 mmol), CuSO<sub>4</sub>·5H<sub>2</sub>O solution (5  $\mu$ L, 1.0 M), and sodium ascorbate solution (5  $\mu$ L, 1.0 M) in DMF (2 mL). The crude product was purified by column chromatography (hexane/ethyl acetate = 1:1); compound **4I** (gummy liquid, 28 mg, 78% yield) was also prepared according to the general procedure (method B) for the synthesis of multivalent 3-tosylamino-2,3-dideoxyneoglycoconjugates from propargyl 3-tosylamino-2,3-dideoxysugar **2a** (22 mg, 0.05 mmol), azide **3h** (22 mg, 0.075 mmol), CuSO<sub>4</sub>·5H<sub>2</sub>O solution (5  $\mu$ L, 1.0 M), and sodium ascorbate solution (5  $\mu$ L, 1.0 M) in DMF (2 mL) under microwave irradiation. The crude product was purified by column chromatography (hexane/ethyl acetate = 1:1); <sup>1</sup>H NMR (CDCl<sub>3</sub>, 400MHz):  $\delta$  7.76 (s, 1H), 7.69 (d, *J* = 8.0 Hz, 2H), 7.27 (d, *J* = 7.6 Hz, 2H), 5.95 (d, *J* = 8.8 Hz, 1H), 5.52 (d, *J* = 5.2 Hz, 1H), 4.93 (d, *J* = 3.6 Hz, 1H), 4.84 (d, *J* = 12.4 Hz, 1H), 4.63-4.69 (m, 4H), 4.48 (dd, *J* = 10.0, 8.8 Hz, 1H), 4.31-4.35 (m, 2H), 4.19-4.24 (m, 4H), 3.88-3.91 (m, 1H), 2.41 (s, 3H), 2.09 (s, 3H), 2.03 (s, 3H), 1.82 (dt, *J* = 14.8, 4.0 Hz, 1H), 1.51 (s, 3H), 1.49 (dd, *J* = 9.2, 2.4 Hz, 1H), 1.41 (s, 3H), 1.38 (s, 3H), 1.29 (s, 3H); <sup>13</sup>C NMR (CDCl<sub>3</sub>,

400MHz):  $\delta$  170.7, 170.4, 143.3, 137.9, 129.7, 126.9, 124.2, 110.0, 109.1, 96.2, 96.0, 71.2, 70.8, 70.3, 67.2, 67.0, 64.6, 62.7, 60.6, 50.7, 47.9, 32.8, 26.0, 24.9, 24.4, 21.5, 21.1, 20.9, 20.8, 14.2; HRMS (ESI)  $m/z$   $[M + Na]^+$  calcd for  $C_{32}H_{44}N_4O_{13}SNa$  747.2523, found 747.2531.

**1,3-Bis{4'-(3''-*p*-toluenesulfonamido-4'',6''-di-*O*-acetyl-2'',3''-dideoxy- $\alpha$ -D-allopyranosyloxymethyl)-1'-*H*-1',2',3'-triazol-1'-methyl}-benzene (6a):**

Compound **6a** (gummy liquid, 44 mg, 83% yield) was prepared according to the general procedure (method A) for the synthesis of multivalent 3-tosylamino-2,3-dideoxyneoglycoconjugates from propargyl 3-tosylamino-2,3-dideoxysugar **2a** (44 mg, 0.1 mmol), diazide **5a** (10 mg, 0.05 mmol),  $CuSO_4 \cdot 5H_2O$  solution (5  $\mu$ L, 1.0 M), and sodium ascorbate solution (5  $\mu$ L, 1.0 M) in DMF (2 mL). The crude product was purified by column chromatography (hexane/ethyl acetate = 1:1); compound **6a** (gummy liquid, 46 mg, 86% yield) was also prepared according to the general procedure (method B) for the synthesis of multivalent 3-tosylamino-2,3-dideoxyneoglycoconjugates from propargyl 3-tosylamino-2,3-dideoxysugar **2a** (44 mg, 0.1 mmol), diazide **5a** (10 mg, 0.05 mmol),  $CuSO_4 \cdot 5H_2O$  solution (5  $\mu$ L, 1.0 M), and sodium ascorbate solution (5  $\mu$ L, 1.0 M) in DMF (2 mL) under microwave irradiation. The crude product was purified by column chromatography (hexane/ethyl acetate = 1:1);  $^1H$  NMR ( $CDCl_3$ , 400MHz):  $\delta$  7.59-7.62 (m, 6H), 7.40-7.44 (m, 1H), 7.23-7.30 (m, 7H), 5.99 (d,  $J$  = 8.8 Hz, 2H), 5.55 (s, 4H), 4.98 (d,  $J$  = 3.2 Hz, 2H), 4.82 (d,  $J$  = 12.0

Hz, 2H), 4.57-4.65 (m, 4H), 4.26-4.36 (m, 2H), 4.12-4.17 (m, 4H), 3.86-3.89 (m, 2H), 2.40 (s, 6H), 2.04 (s, 6H), 1.98 (s, 6H), 1.83 (dt,  $J = 14.8, 4.0$  Hz, 2H), 1.56 (d,  $J = 2.8$  Hz, 2H);  $^{13}\text{C}$  NMR ( $\text{CDCl}_3$ , 400MHz):  $\delta$  170.7, 170.2, 143.4, 137.7, 135.8, 129.8, 128.5, 127.6, 126.9, 122.7, 96.6, 66.9, 64.7, 62.6, 60.8, 60.4, 54.3, 48.0, 32.9, 21.5, 21.0, 20.8, 20.7, 14.2; HRMS (ESI)  $m/z$   $[\text{M} + \text{Na}]^+$  calcd for  $\text{C}_{48}\text{H}_{58}\text{N}_8\text{O}_{16}\text{S}_2\text{Na}$  1089.3310, found 1089.3312.

**1,3-Bis{4'-(3''-*p*-toluenesulfonamido-4''-*O*-acetyl-2'',3'',6''-trideoxy- $\alpha$ -L-ribohexopyranosyloxymethyl)-1'-*H*-1',2',3'-triazol-1'-methyl}benzene (6b):**

Compound **6b** (gummy liquid, 28 mg, 61% yield) was prepared according to the general procedure (method A) for the synthesis of multivalent 3-tosylamino-2,3-dideoxyneoglycoconjugates from propargyl 3-tosylamino-2,3-dideoxysugar **2c** (38 mg, 0.1 mmol), diazide **5a** (10 mg, 0.05 mmol),  $\text{CuSO}_4 \cdot 5\text{H}_2\text{O}$  solution (5  $\mu\text{L}$ , 1.0 M), and sodium ascorbate solution (5  $\mu\text{L}$ , 1.0 M) in DMF (2 mL). The crude product was purified by column chromatography (hexane/ethyl acetate = 1:1); compound **6b** (gummy liquid, 30 mg, 65% yield) was also prepared according to the general procedure (method B) for the synthesis of multivalent 3-tosylamino-2,3-dideoxyneoglycoconjugates from propargyl 3-tosylamino-2,3-dideoxysugar **2c** (38 mg, 0.1 mmol), diazide **5a** (10 mg, 0.05 mmol),  $\text{CuSO}_4 \cdot 5\text{H}_2\text{O}$  solution (5  $\mu\text{L}$ , 1.0 M), and sodium ascorbate solution (5  $\mu\text{L}$ , 1.0 M) in DMF (2 mL) under microwave irradiation. The crude product was purified by column chromatography (hexane/ethyl acetate = 1:1);  $^1\text{H}$  NMR

(CDCl<sub>3</sub>, 400MHz):  $\delta$  7.62 (d,  $J$  = 8.0 Hz, 4H), 7.54 (s, 2H), 7.41-7.44 (m, 2H), 7.23-7.34 (m, 6H), 5.97 (d,  $J$  = 8.8 Hz, 2H), 5.58 (s, 4H), 4.88 (d,  $J$  = 2.4 Hz, 2H), 4.82 (d,  $J$  = 12.0 Hz, 2H), 4.59 (d,  $J$  = 12.4 Hz, 2H), 4.32-4.61 (m, 2H), 3.99-4.07 (m, 2H), 3.80-3.83 (m, 2H), 2.40 (s, 6H), 2.01 (s, 6H), 1.76-1.81 (m, 2H), 1.51 (d,  $J$  = 14.4 Hz, 2H), 1.18 (d,  $J$  = 6.0 Hz, 6H); <sup>13</sup>C NMR (CDCl<sub>3</sub>, 400MHz):  $\delta$  170.6, 144.4, 143.2, 137.9, 136.7, 135.2, 129.8, 129.7, 129.6, 128.6, 128.0, 127.8, 126.9, 122.4, 96.2, 72.5, 62.3, 60.6, 54.3, 54.0, 48.0, 33.1, 21.5, 21.0, 17.4, 14.2; HRMS (ESI)  $m/z$  [M+H]<sup>+</sup> calcd for C<sub>44</sub>H<sub>55</sub>N<sub>8</sub>O<sub>12</sub>S<sub>2</sub> 951.3381, found 951.3361.

**2,4,6-Tris{2-[4'-(3''-*p*-toluenesulfonamido-4'',6''-di-*O*-acetyl-2'',3''-dideoxy- $\alpha$ -D-allopyranosyloxymethyl)-1'*H*-1',2',3'-triazol-1'-yl]ethoxy}-1,3,5-triazine (6c):** Compound **6c** (gummy liquid, 54 mg, 66% yield) was prepared according to the general procedure (method A) for the synthesis of multivalent 3-tosylamino-2,3-dideoxyneoglycoconjugates from propargyl 3-tosylamino-2,3-dideoxysugar **2a** (66 mg, 0.15 mmol), triazide **5b** (17 mg, 0.05 mmol), CuSO<sub>4</sub>·5H<sub>2</sub>O solution (5  $\mu$ L, 1.0 M), and sodium ascorbate solution (5  $\mu$ L, 1.0 M) in DMF (2 mL). The crude product was purified by column chromatography (hexane/ethyl acetate = 1:1); compound **6c** (gummy liquid, 56 mg, 68% yield) was also prepared according to the general procedure (method B) for the synthesis of multivalent 3-tosylamino-2,3-dideoxyneoglycoconjugates from propargyl 3-tosylamino-2,3-dideoxysugar **2a** (66 mg, 0.15 mmol), triazide **5b** (17 mg,

0.05 mmol), CuSO<sub>4</sub>·5H<sub>2</sub>O solution (5 μL, 1.0 M), and sodium ascorbate solution (5 μL, 1.0 M) in DMF (2 mL) under microwave irradiation. The crude product was purified by column chromatography (hexane/ethyl acetate = 1:1); <sup>1</sup>H NMR (CDCl<sub>3</sub>, 400MHz): δ 7.78 (s, 3H), 7.66 (d, *J* = 8.4 Hz, 6H), 7.29 (d, *J* = 8.8 Hz, 6H), 5.93 (d, *J* = 9.2 Hz, 3H), 4.98 (d, *J* = 3.2 Hz, 3H), 4.83-4.87 (m, 6H), 4.62-4.65 (m, 3H), 4.56 (t, *J* = 4.8 Hz, 6H), 4.31 (dd, *J* = 12.0, 4.8 Hz, 3H), 4.18-4.20 (m, 6H), 3.86-3.89 (m, 3H), 3.65 (t, *J* = 4.8 Hz, 6H), 2.41 (s, 9H), 2.08 (s, 9H), 2.01 (s, 9H), 1.84 (dt, *J* = 14.8, 4.0 Hz, 3H), 1.56 (dd, *J* = 12.0, 2.8 Hz, 3H); <sup>13</sup>C NMR (CDCl<sub>3</sub>, 400MHz): δ 173.1, 171.8, 171.6, 170.8, 170.4, 143.4, 137.7, 129.8, 126.9, 96.4, 67.4, 66.9, 64.6, 62.6, 60.6, 49.4, 48.9, 47.9, 32.8, 21.5, 20.9; HRMS (ESI) *m/z* [M + Na]<sup>+</sup> calcd for C<sub>69</sub>H<sub>87</sub>N<sub>15</sub>O<sub>27</sub>S<sub>3</sub>Na 1676.4956, found 1676.4979.

## References

1. Shull, B. K.; Wu, Z.; Koreeda, M. *J. Carbohydr. Chem.* **1996**, *15*, 955.
2. Tang, K.-C.; Mariuzza, R.; Coward, J. K. *J. Med. Chem.* **1981**, *24*, 1277.
3. Liu, C.; Coward, J. K. *J. Med. Chem.* **1991**, *34*, 2094.
4. Maier, M. A.; Yannopoulos, C. G.; Mohamed, N.; Roland, A.; Fritz, H.; Mohan, V.; Just, G.; Manoharan, M. *Bioconjugate Chem.* **2003**, *14*, 18.
5. Hou, D.-R.; Kuan, T.-C.; Li, Y.-K.; Lee, R.; Huang, K.-W. *Tetrahedron*, **2010**, *66*, 9415-9420.
6. Alvarez, S. G.; Alvarez, M. T. *Synthesis* **1997**, 413.



7. Perez-Balderas, F.; Ortega-Munoz, M.; Morales-Sanfrutos, J.; Hernandez-Mateo, F.; Calvo-Flores, F. G.; Calvo-Asín, J. A.; Isac-García, J.; Santoyo-Gonzalez, F. *Org. Lett.* **2003**, *5*, 1951.
8. Theocharis, A. B.; Alexandrou, N. E.; Terzis, A. *J. Heterocycl. Chem.* **1990**, *27* 1741.
9. Wuytswinkel, G. V.; Verheyde, B.; Compernelle, F.; Toppet, S.; Dehaen, W. *J. Chem. Soc. Perkin I* **2000**, *9*, 1337.
10. Ding, F. Q.; William, R.; Cai, S. T.; Ma, J.; Liu, X.-W. *J. Org. Chem.* **2012**, *77*, 5245.

**NMR spectra for all compounds.**

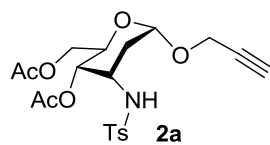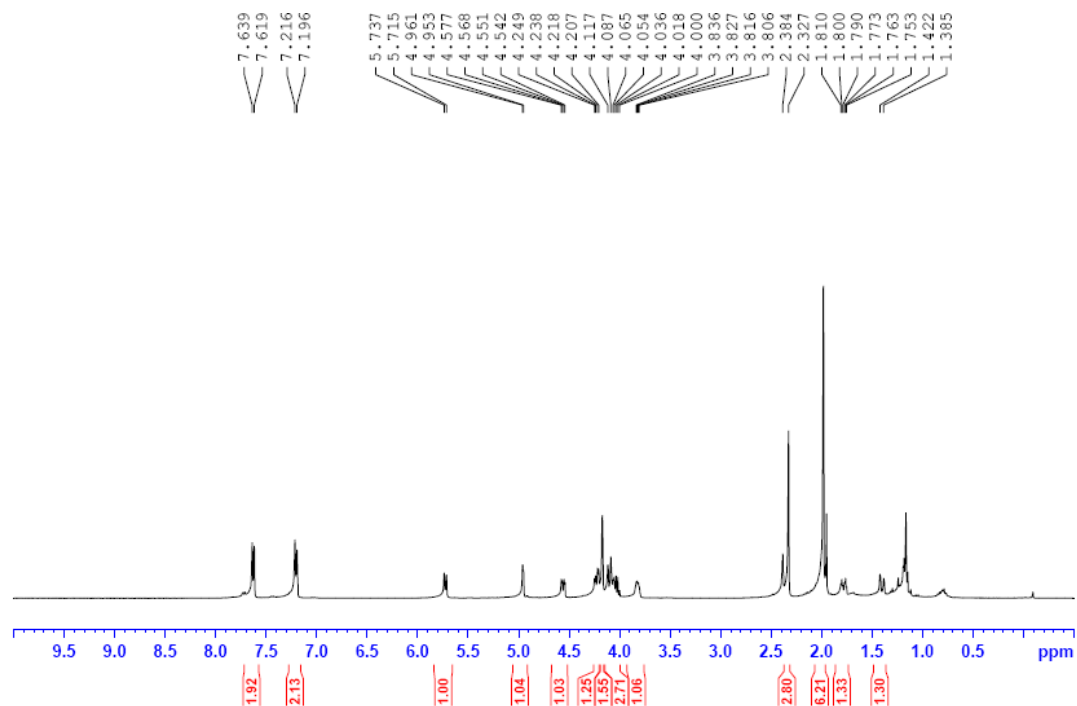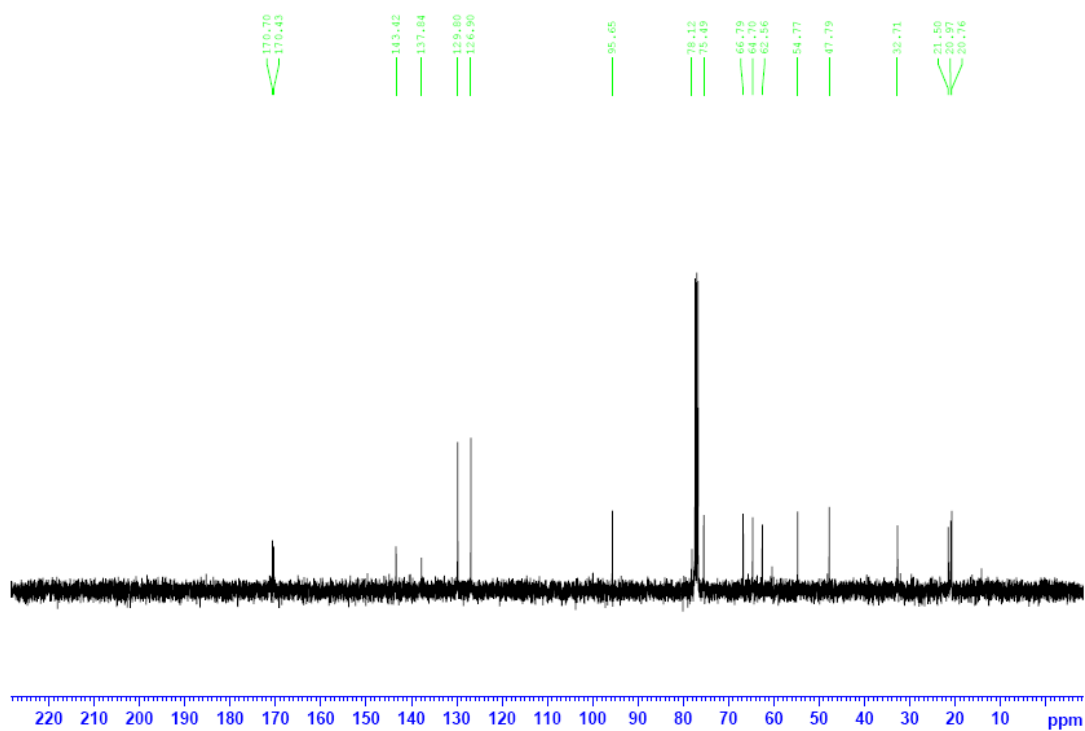

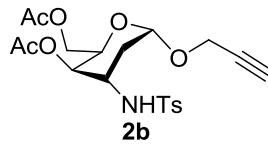

D2-142-1p, 1H NMR, JUL, BBFO1 400HZ

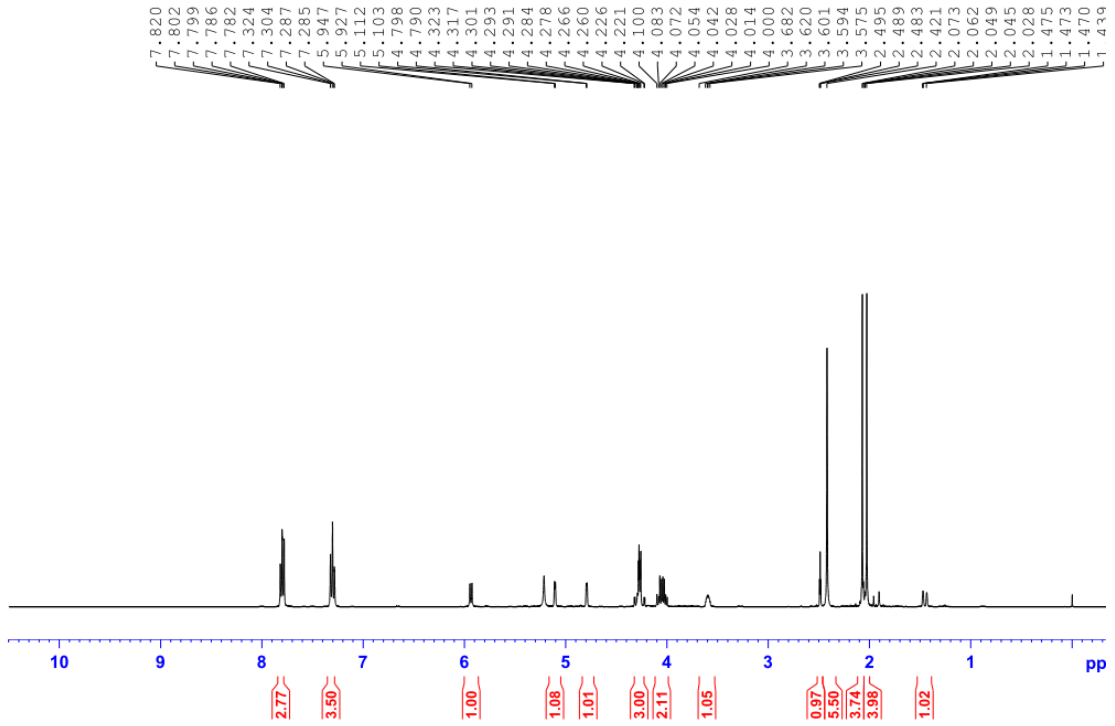

D2-142-1p, 13C NMR, JUL, BBFO1 400HZ

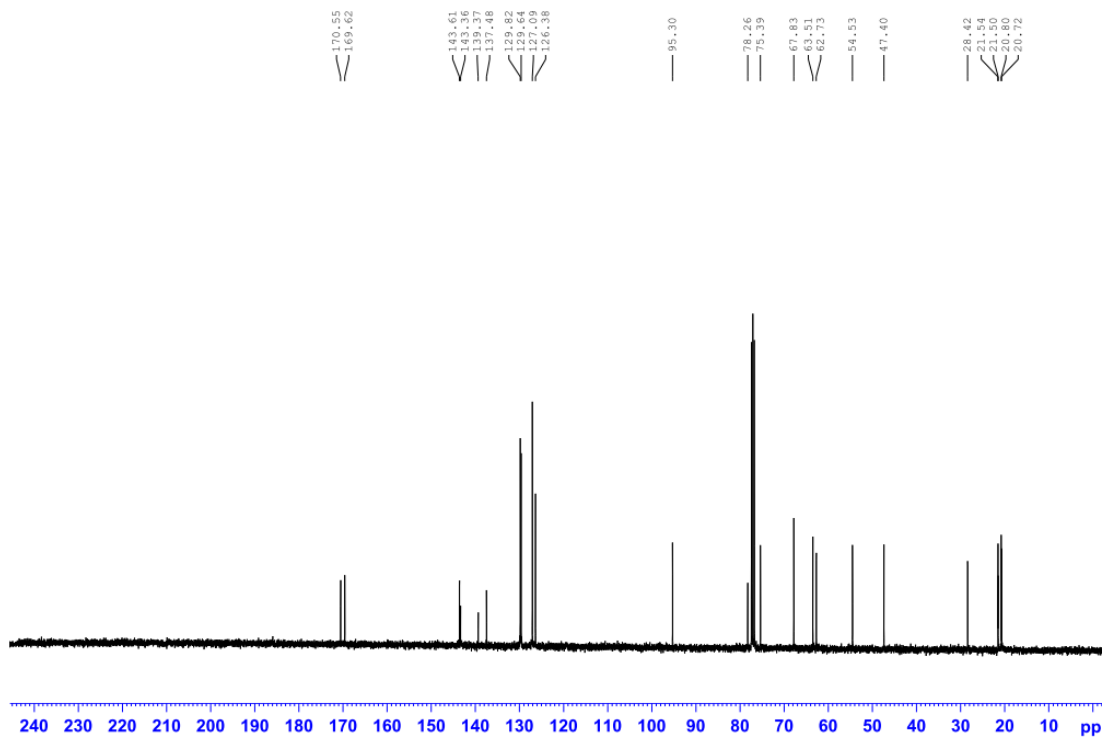

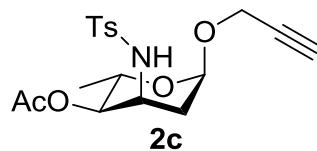

D2-114-1p, <sup>1</sup>H NMR, AV400MHz, CDCl<sub>3</sub>

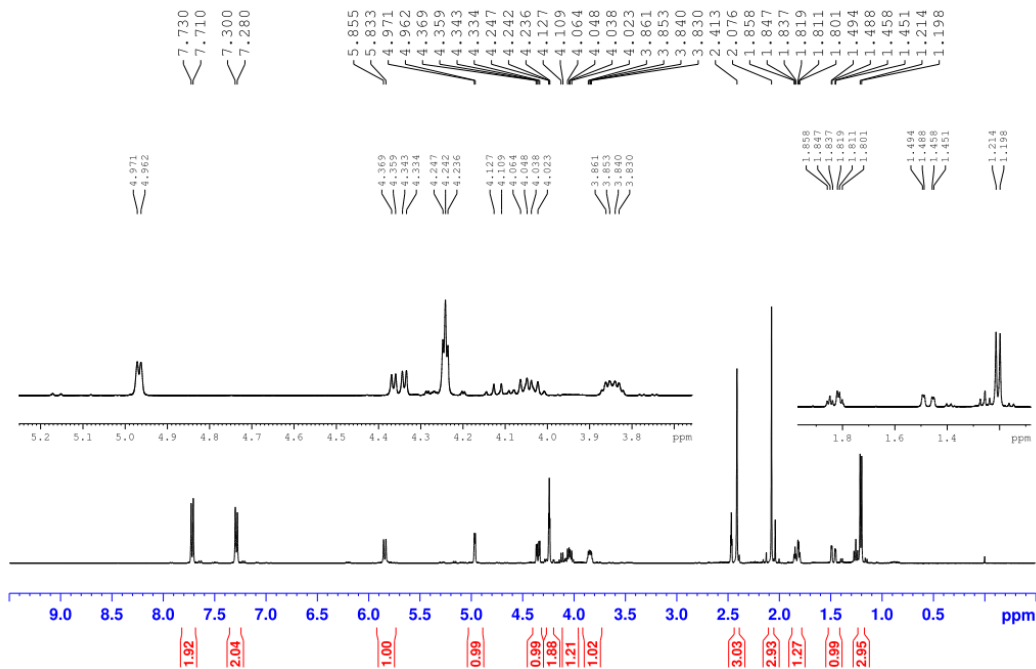

D2-114-1p, <sup>13</sup>C NMR, AV400MHz, CDCl<sub>3</sub>

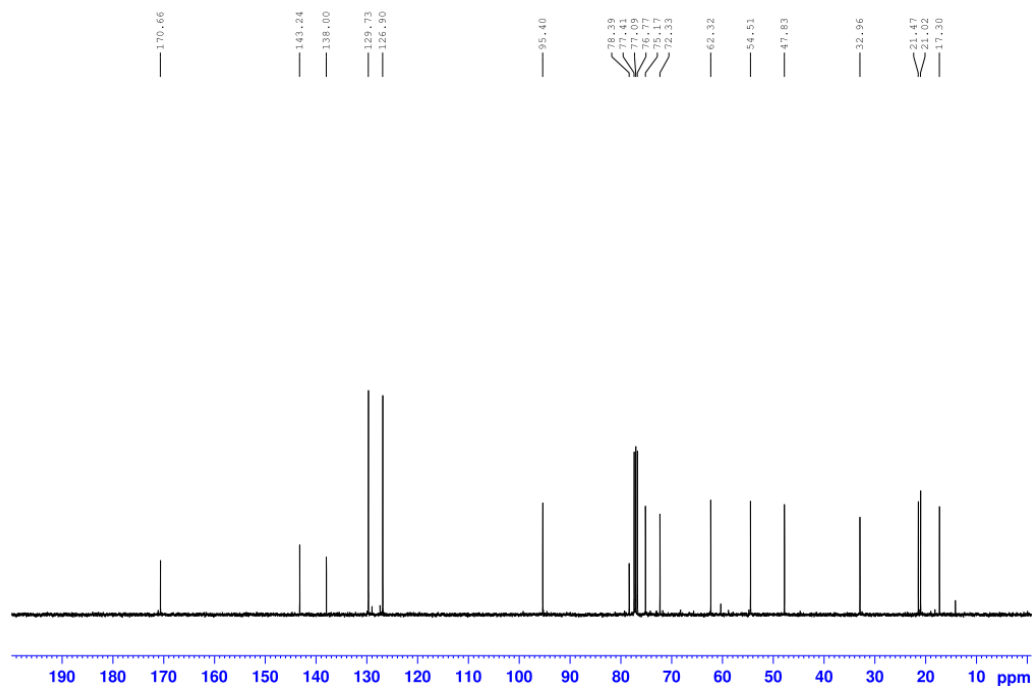

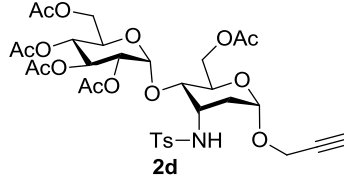

D2-121-1p, <sup>1</sup>H NMR, AV400MHz, CDCl<sub>3</sub>

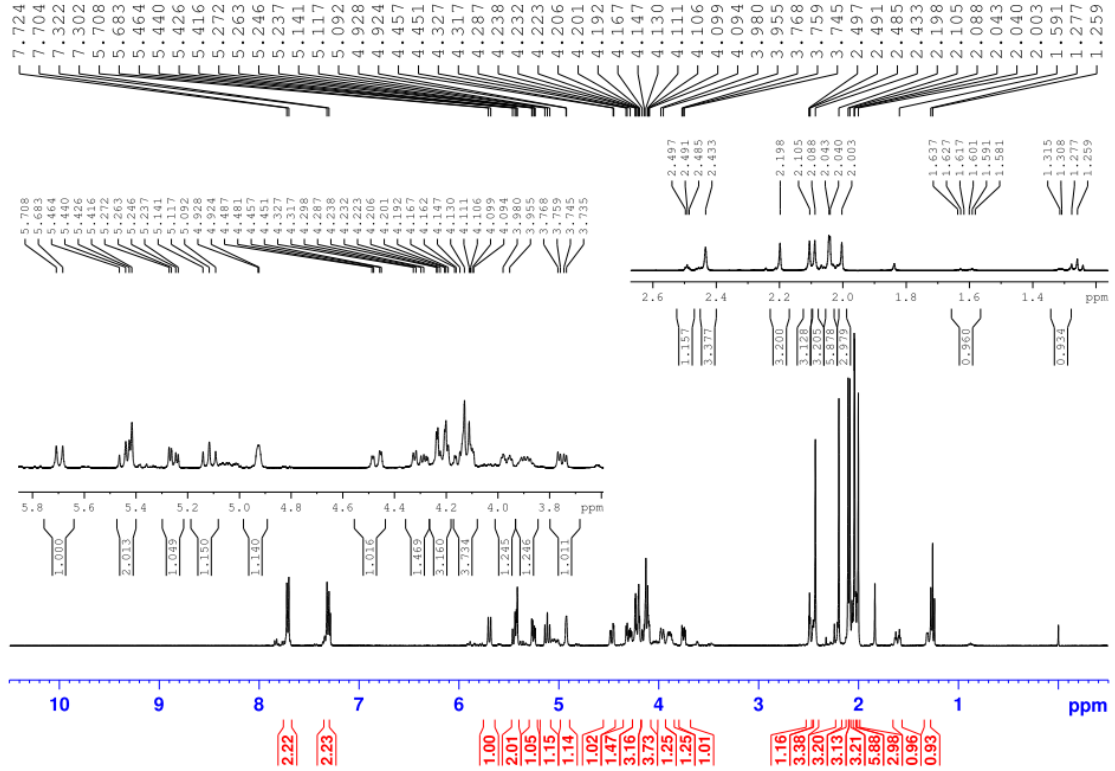

D2-121-1p, <sup>13</sup>C NMR, AV400MHz, CDCl<sub>3</sub>

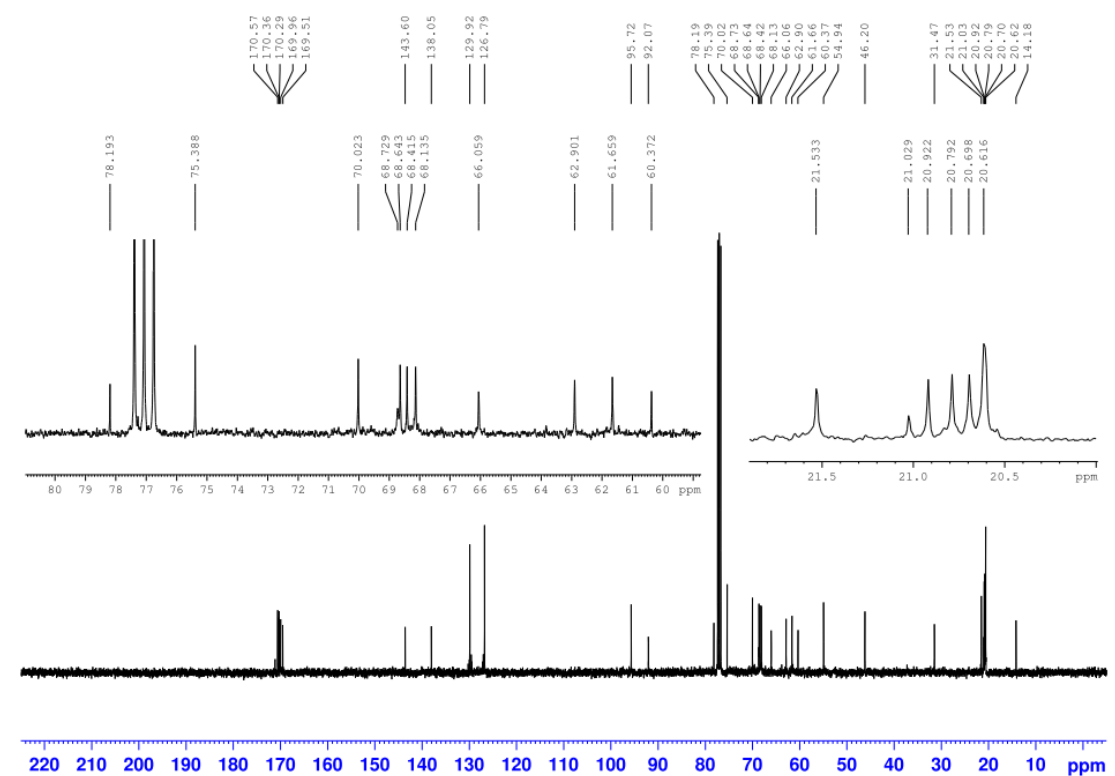

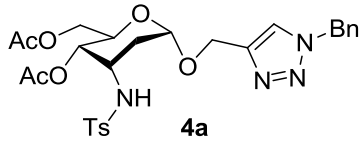

D2-112-2p, <sup>1</sup>H NMR, AV400MHz, CDCl<sub>3</sub>

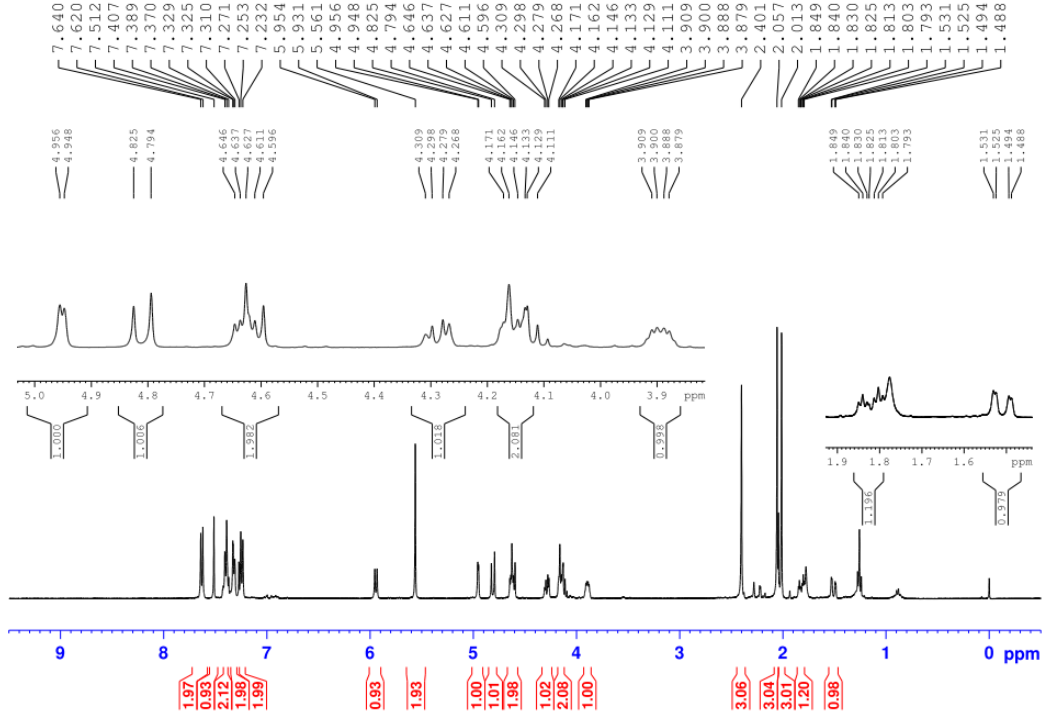

D2-112-2p, <sup>13</sup>C NMR, AV400MHz, CDCl<sub>3</sub>

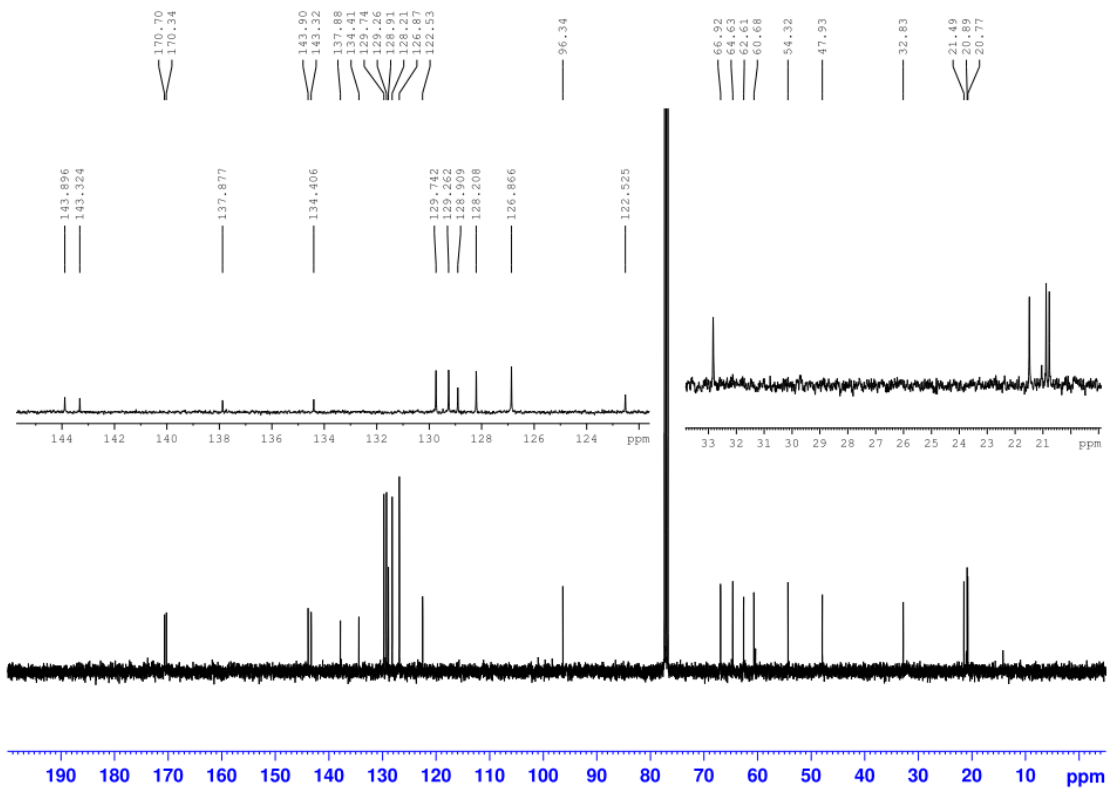

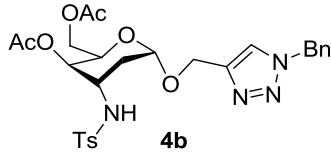

D2-150-1P, 1H, BBFO1,400 Hz, CDC13

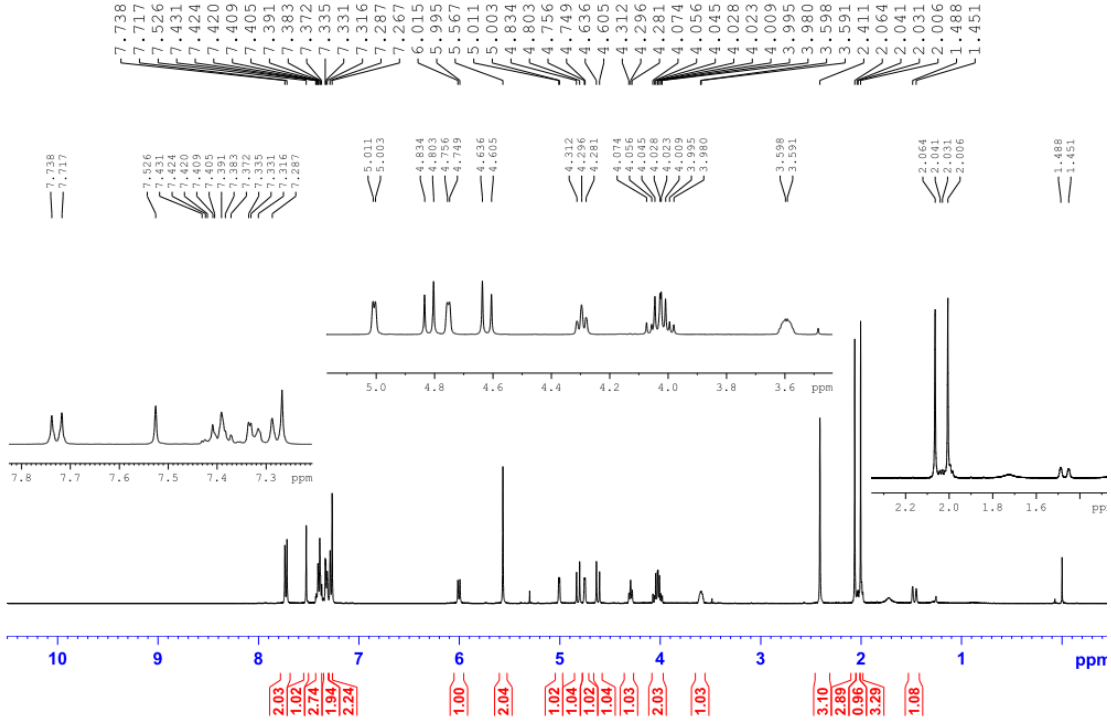

D2-150-1P, 13C, BBFO1,400 Hz, CDC13

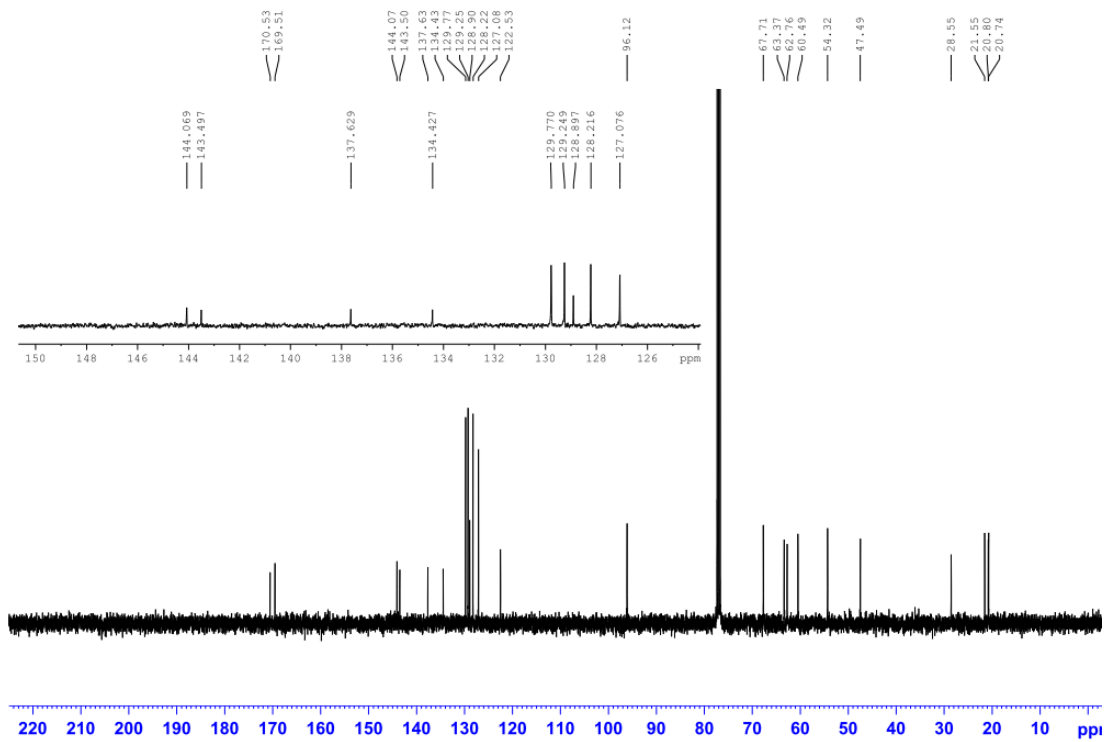

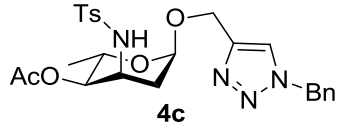

D2-123-1P, 1H, BBFO1, 400 Hz, CDCl<sub>3</sub>

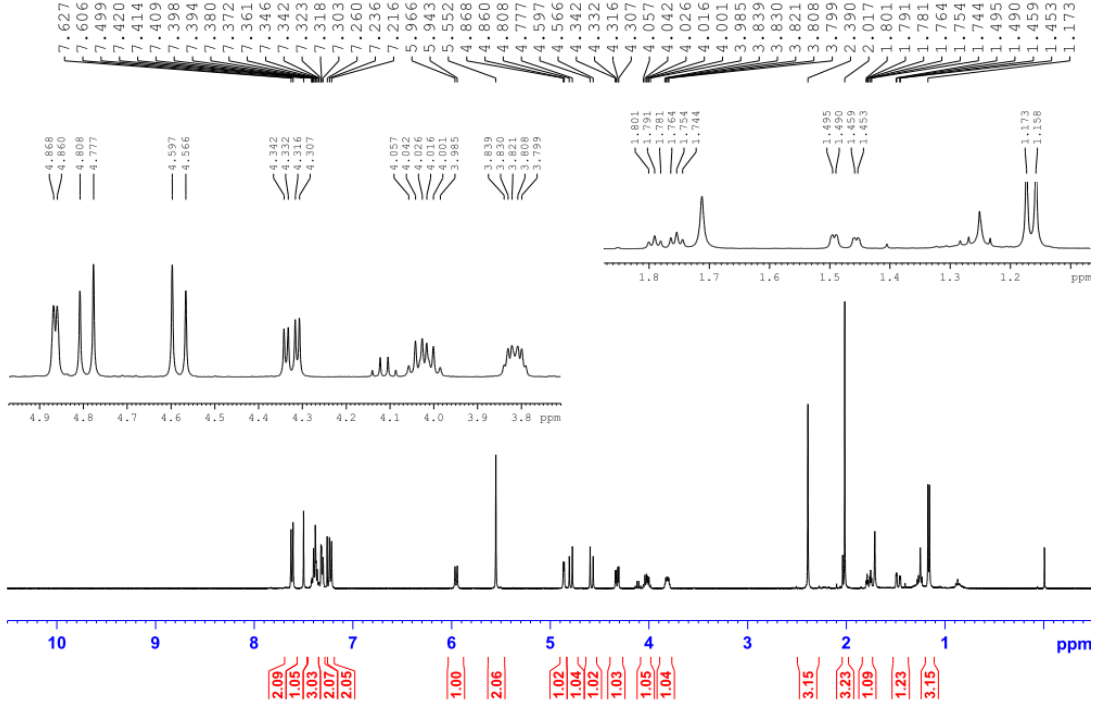

D2-123-1P, 13C, BBFO1, 400 Hz, CDCl<sub>3</sub>

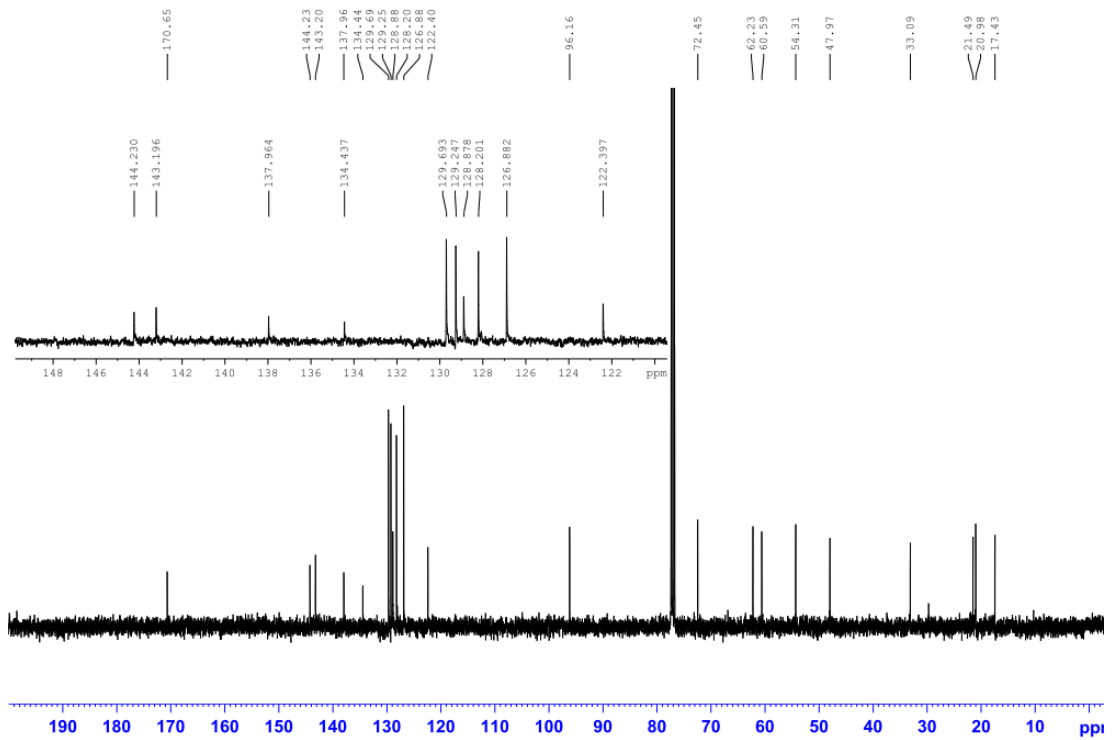



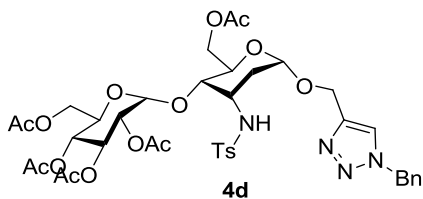

D2-128-1p, <sup>1</sup>HNMR, CDCl<sub>3</sub>, AV400MHz

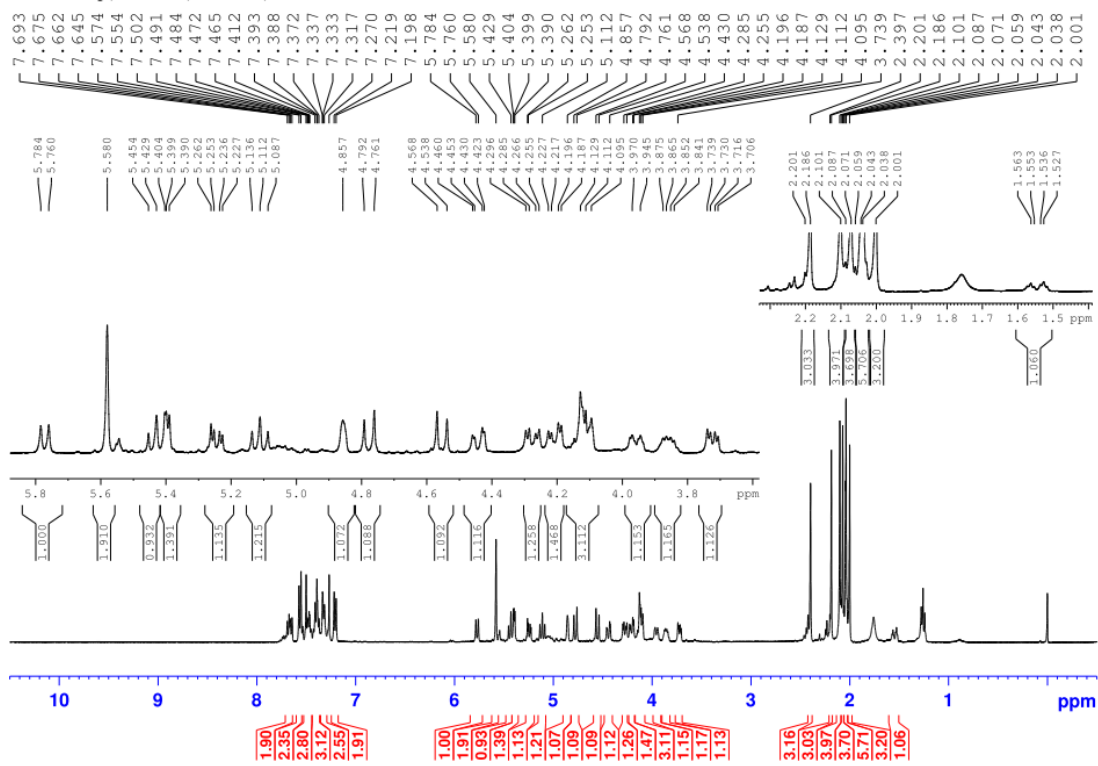

D2-128-1p, <sup>13</sup>CNMR, CDCl<sub>3</sub>, AV400MHz

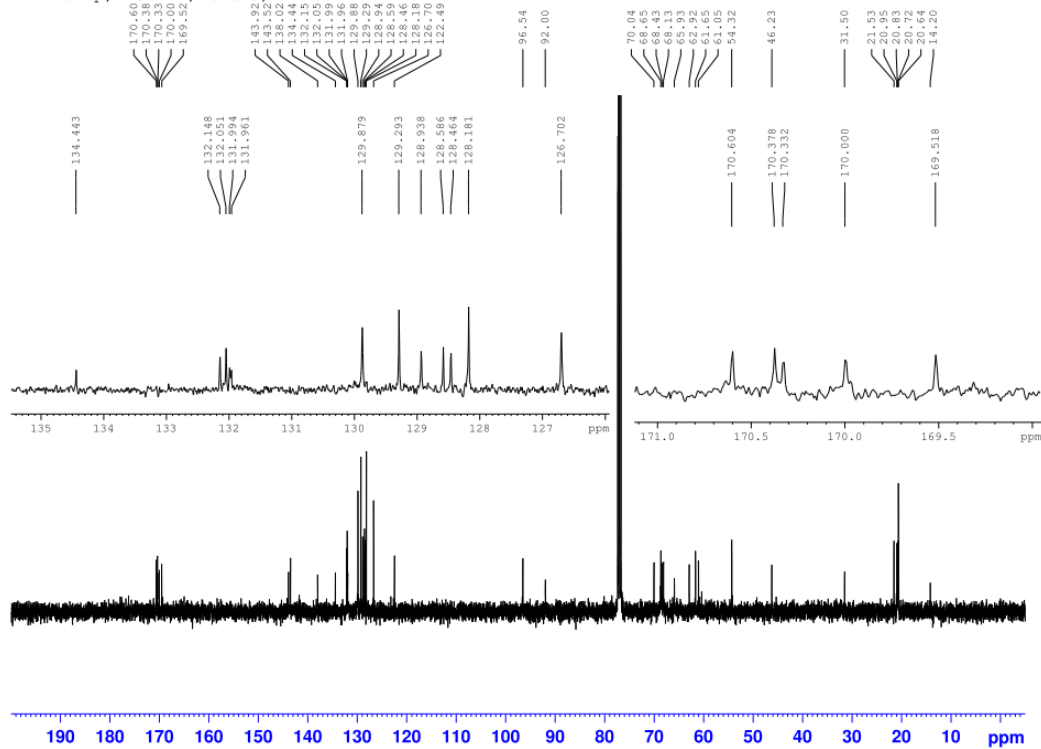

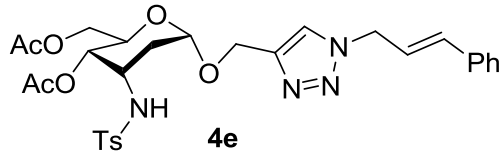

D2-147-1p, 1H NMR, JUL, BBFO1 400HZ

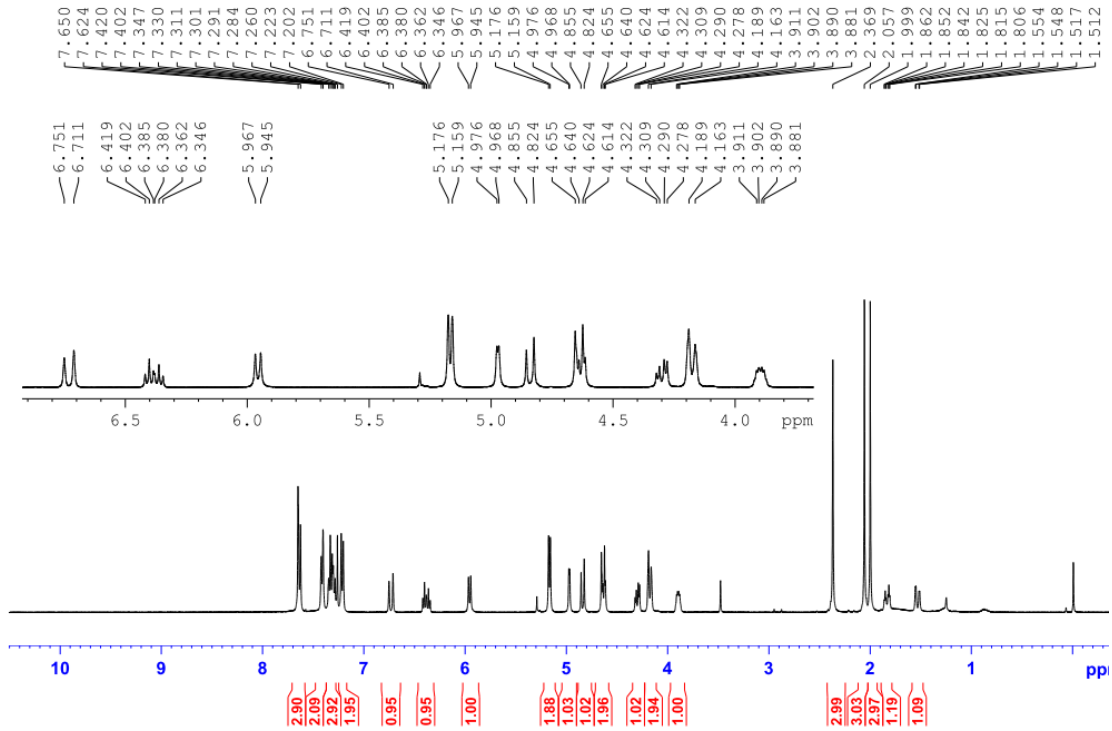

D2-147-1p, 13C NMR, JUL, BBFO1 400HZ

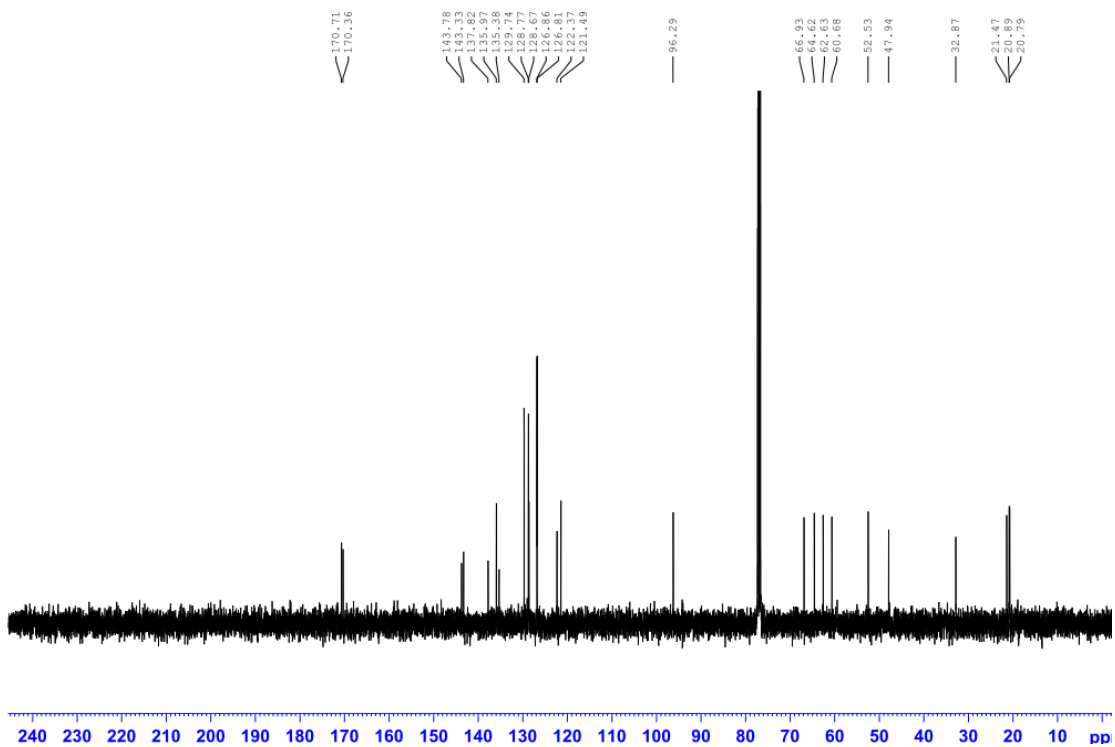

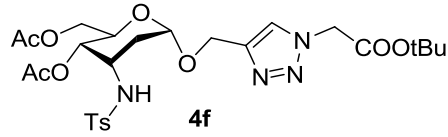

D2-136-1p, <sup>1</sup>HNMR, CDCl<sub>3</sub>, AV400MHz

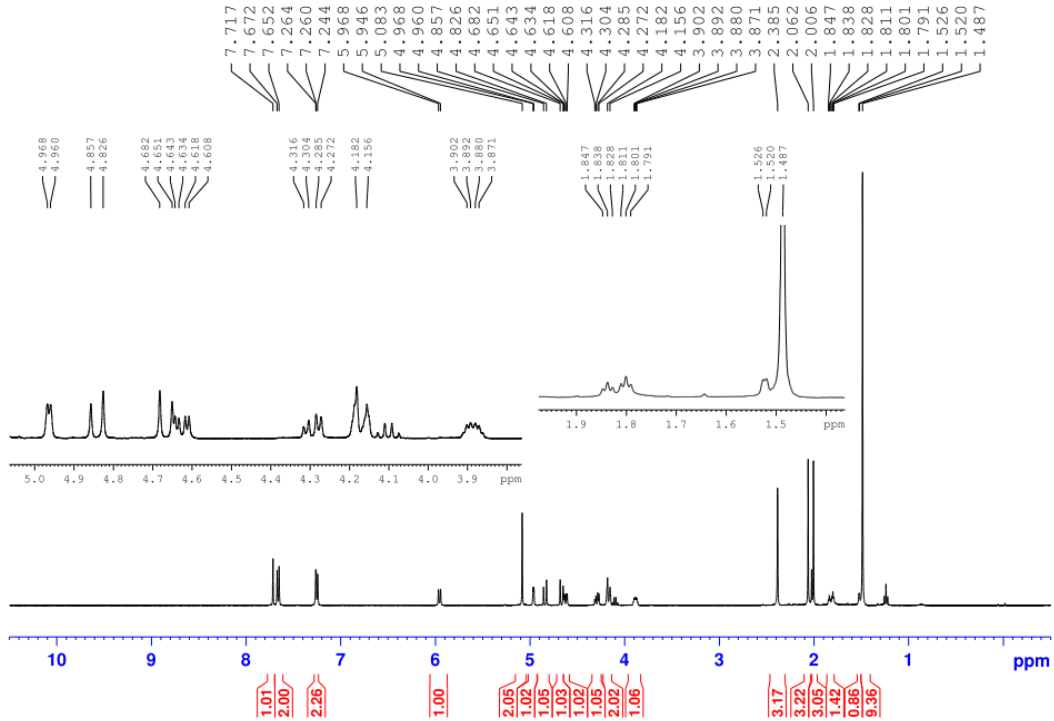

D2-136-1p, <sup>13</sup>CNMR, CDCl<sub>3</sub>, AV400MHz

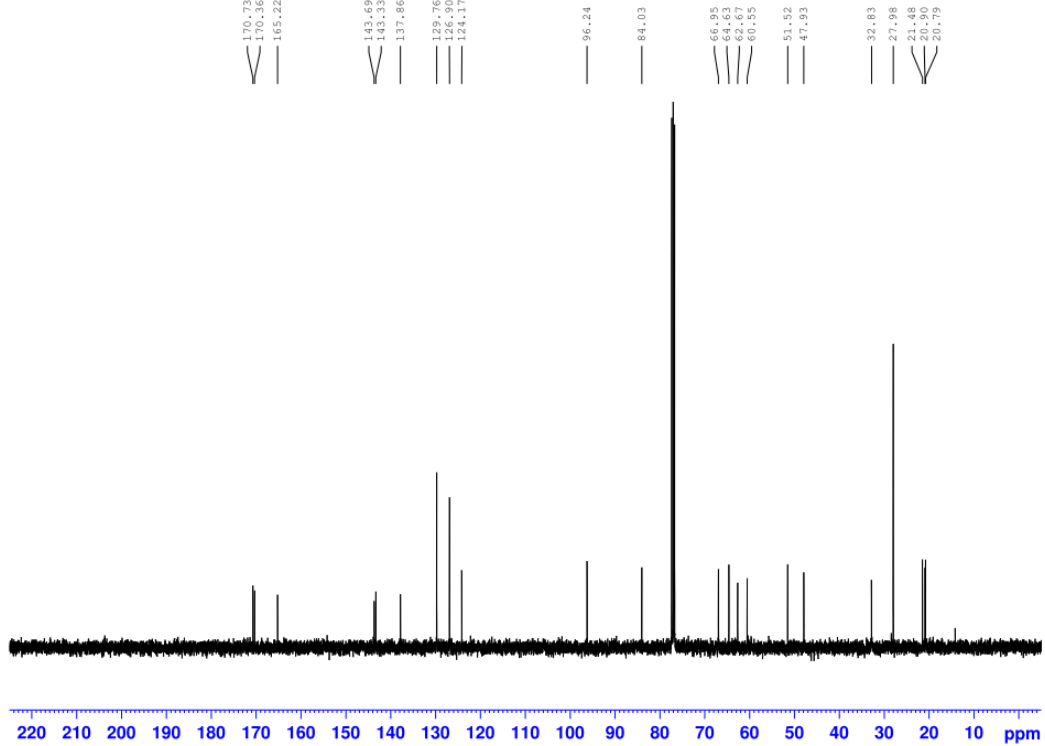

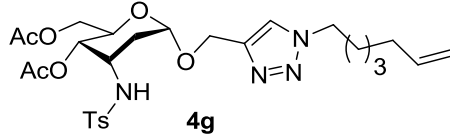

D3-003-1p, <sup>1</sup>H NMR, CDCl<sub>3</sub>, AV400MHz

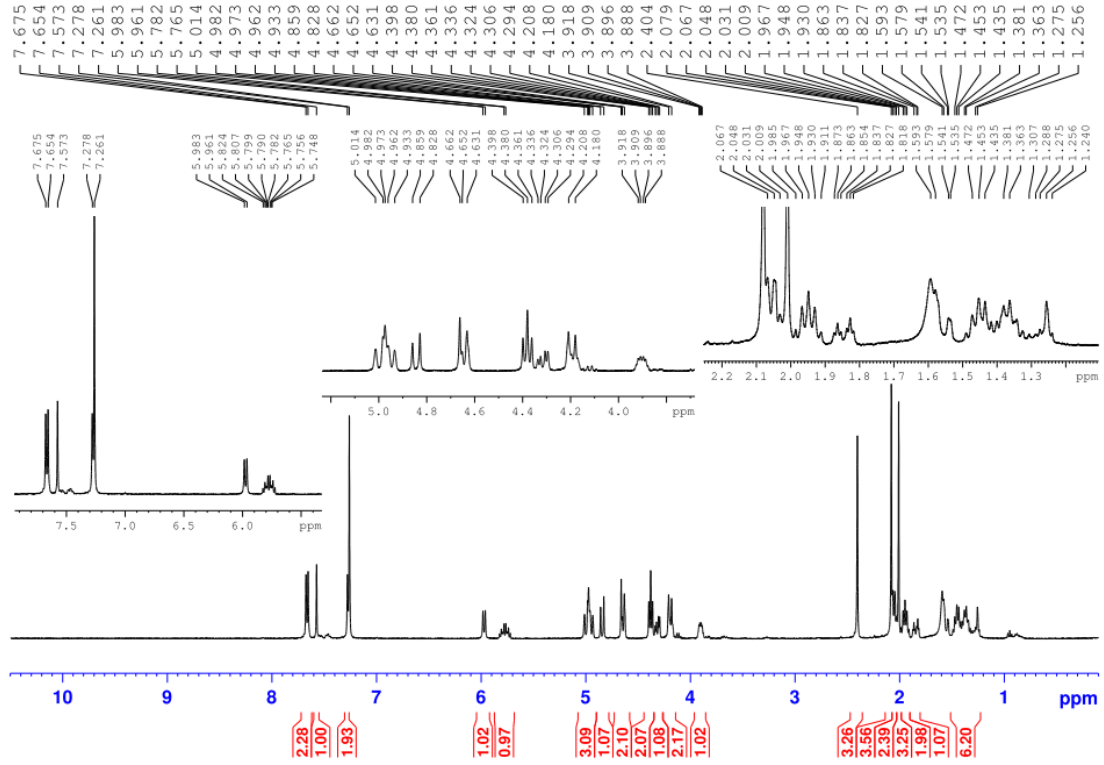

D3-003-1p, <sup>13</sup>C NMR, CDCl<sub>3</sub>, AV400MHz

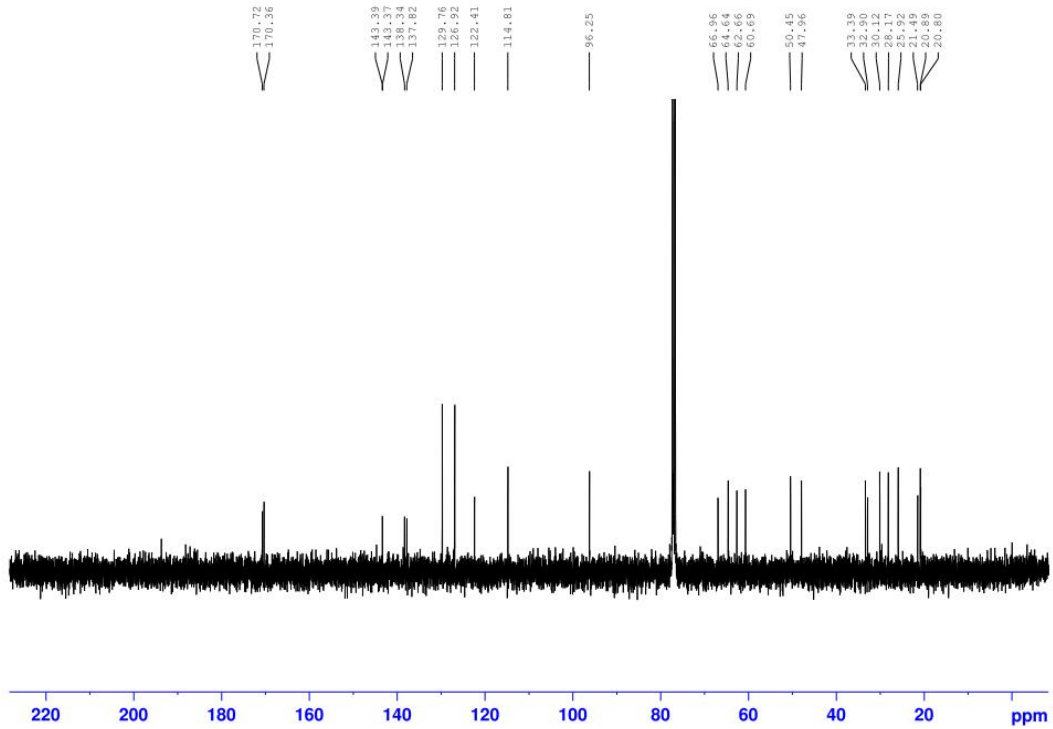

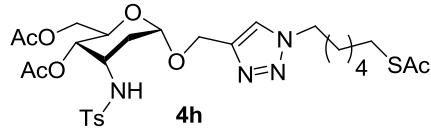

D3-048-1p 1H NMR Av 400 MHz CDC13, oct-2011

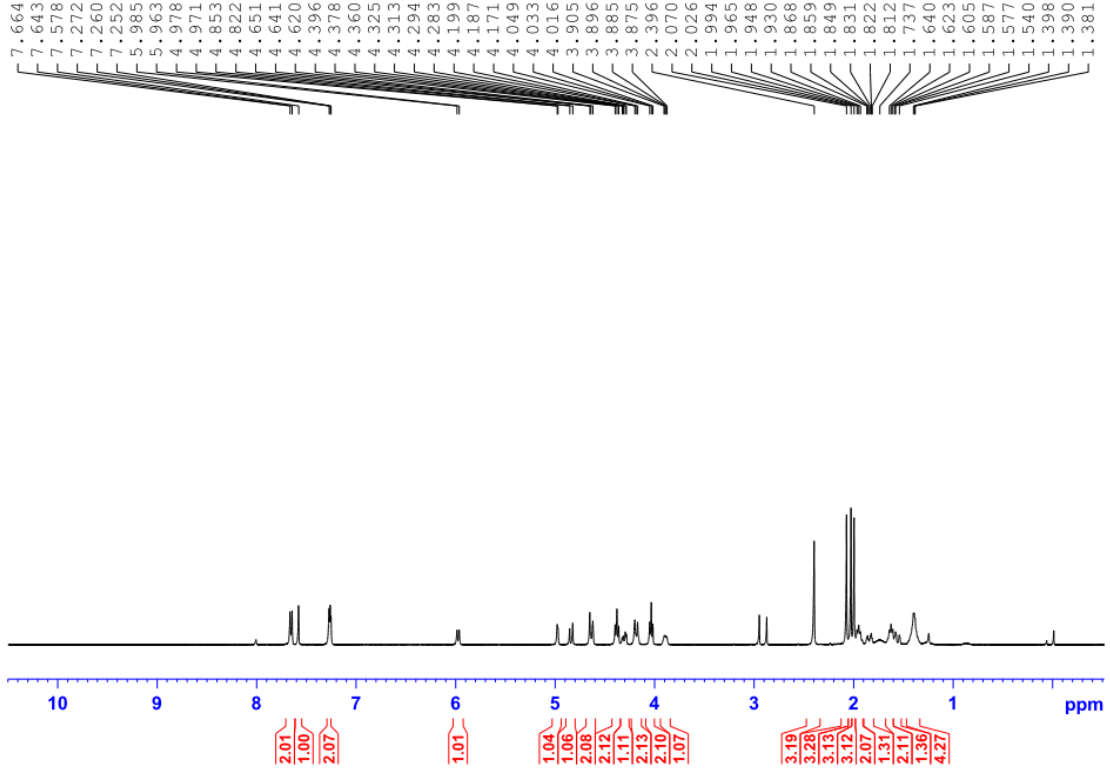

D3-048-1p 13C NMR Av 400 MHz CDC13, oct-2011

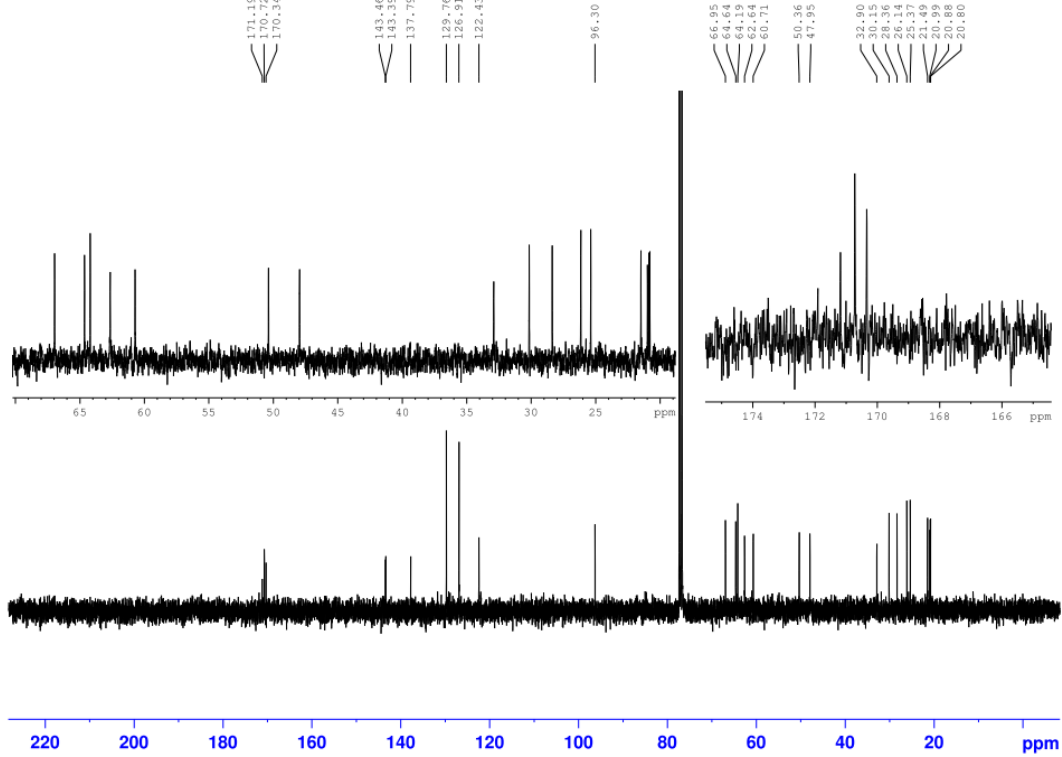

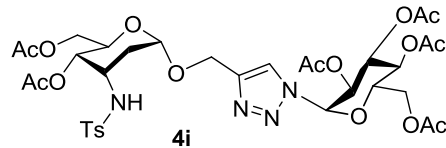

D2-139-1p, <sup>1</sup>H NMR, JUL, BBFO1 400HZ

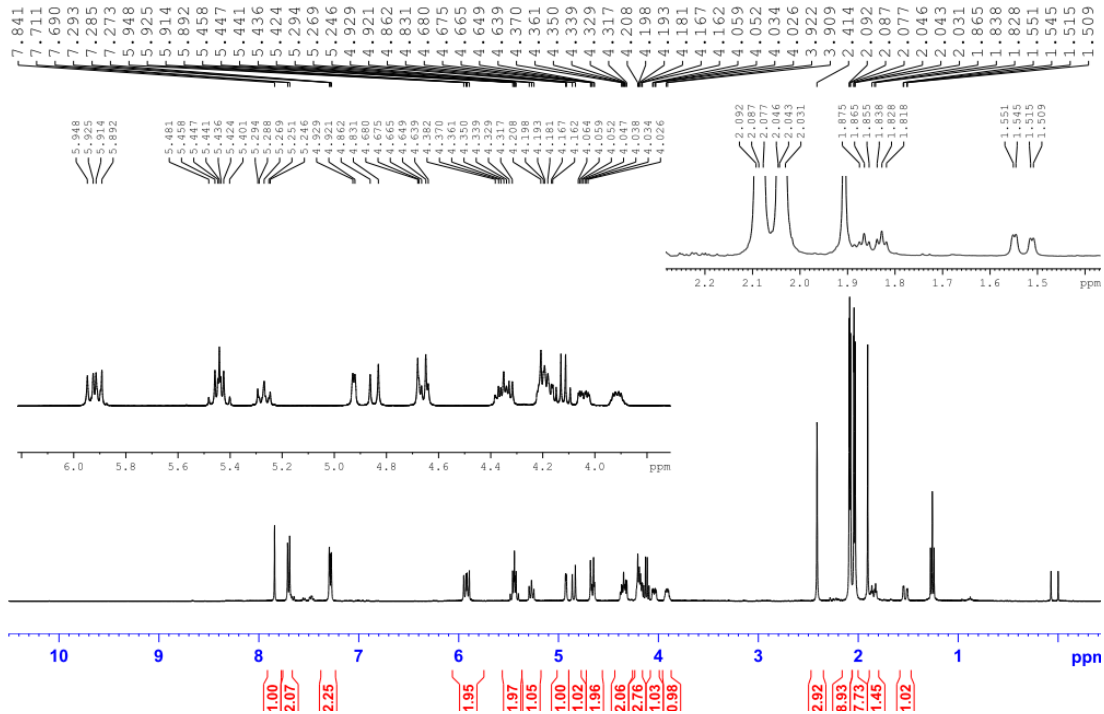

D2-139-1p, <sup>13</sup>C NMR, JUL, BBFO1 400HZ

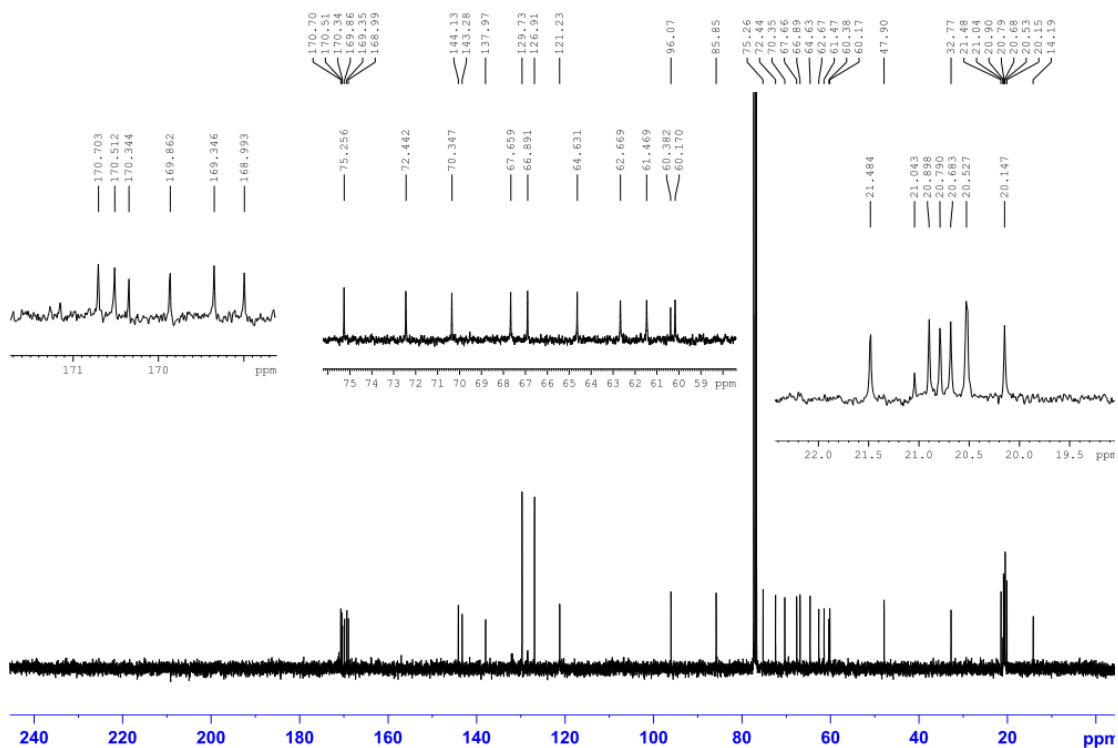



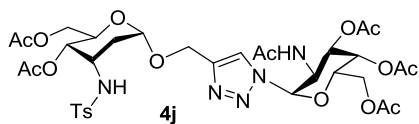

D2-124-1p, <sup>13</sup>C NMR, AV400MHz, CDCl<sub>3</sub>

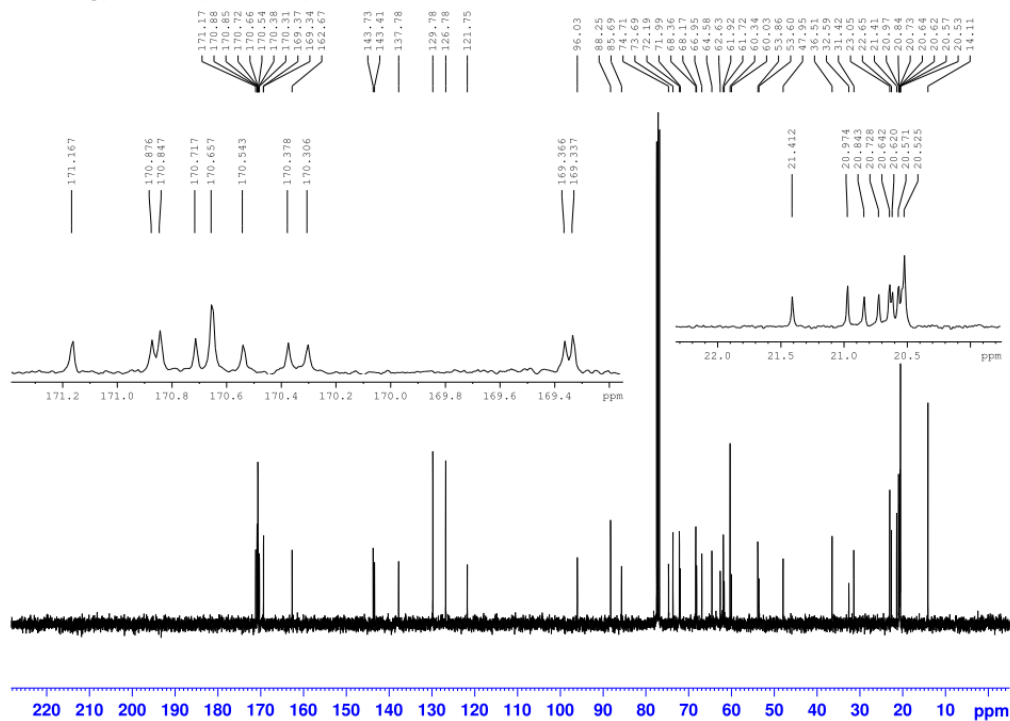



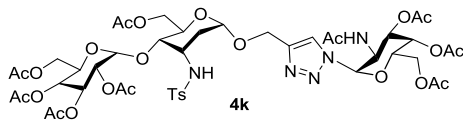

D2-129-1p, 1H NMR, BBFO1 400HZ

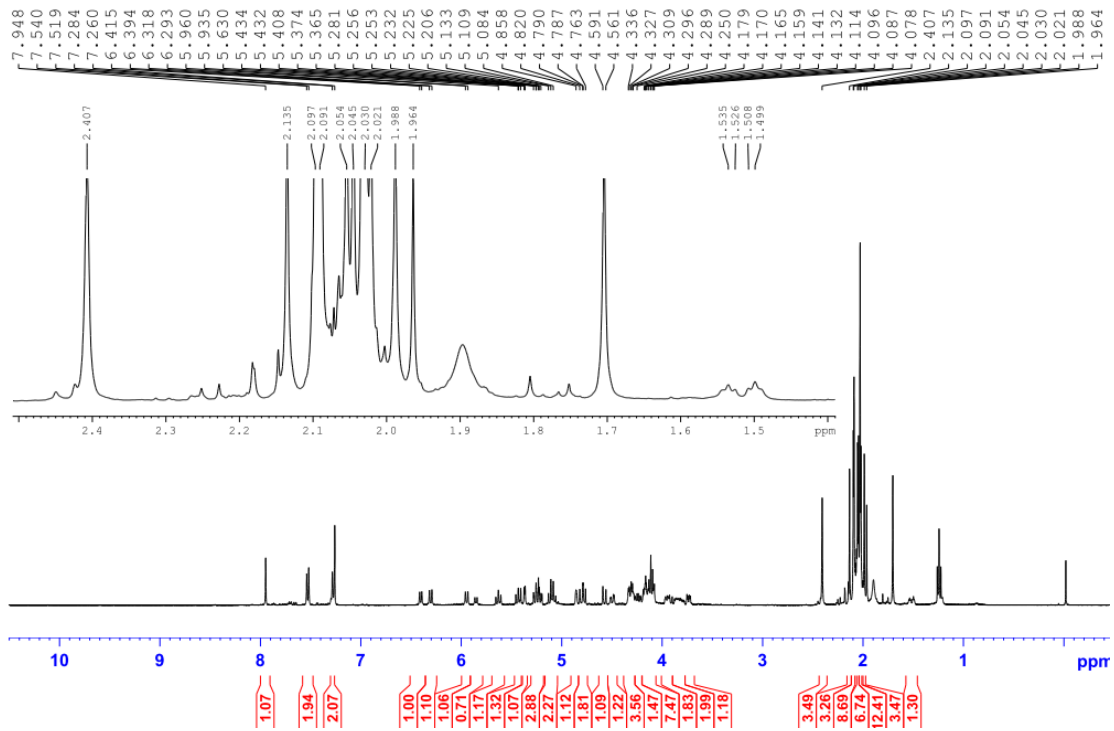

D2-129-1p, 1H NMR, BBFO1 400HZ

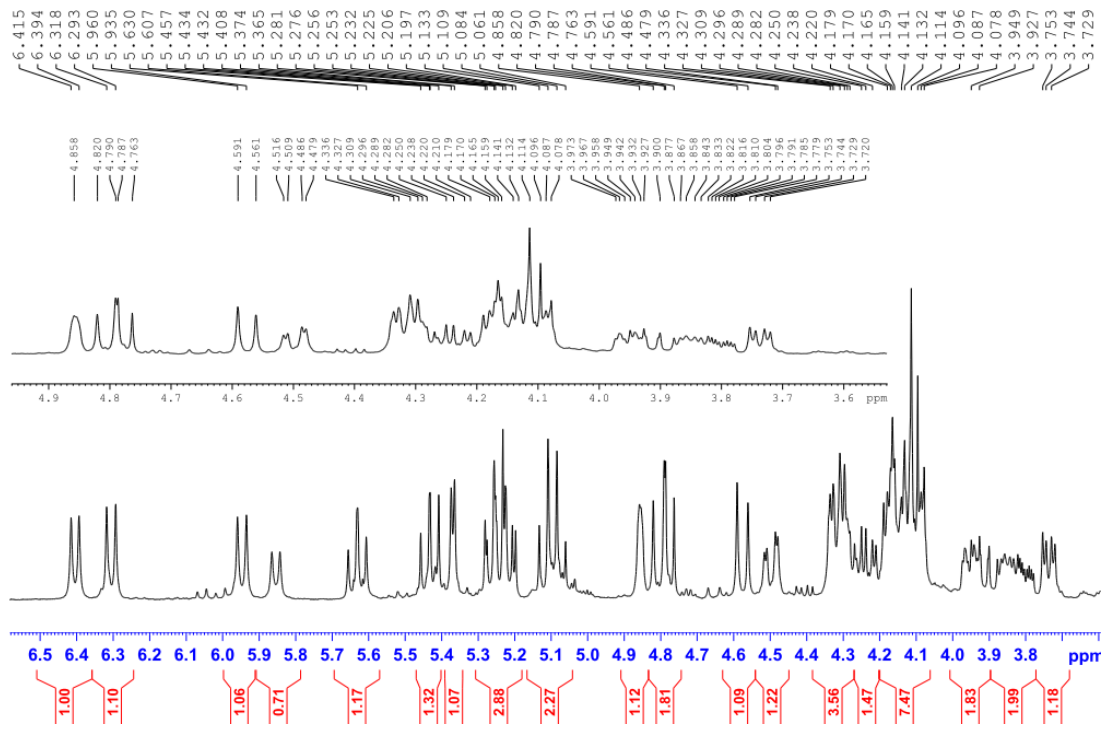

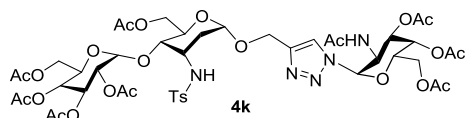

D2-129-1p, <sup>13</sup>C NMR, BBFO1 400HZ

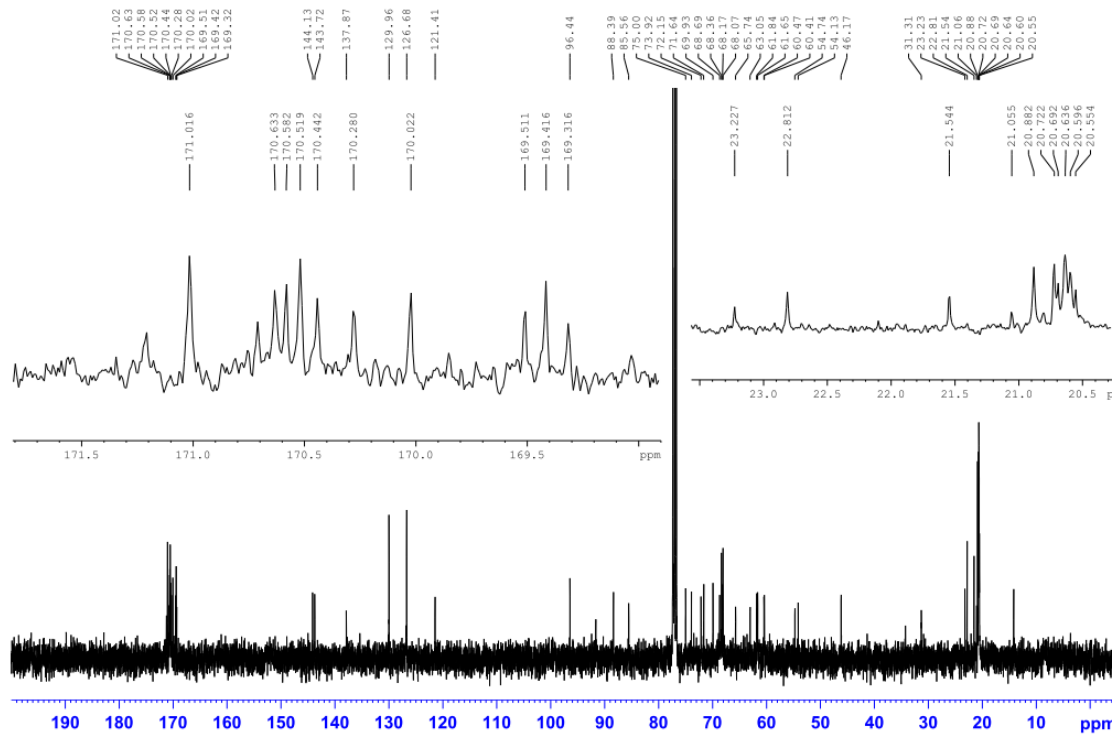

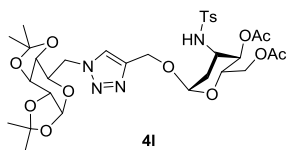

D3-030-1p, 1H Av 400 MHz CDCl3, sep11

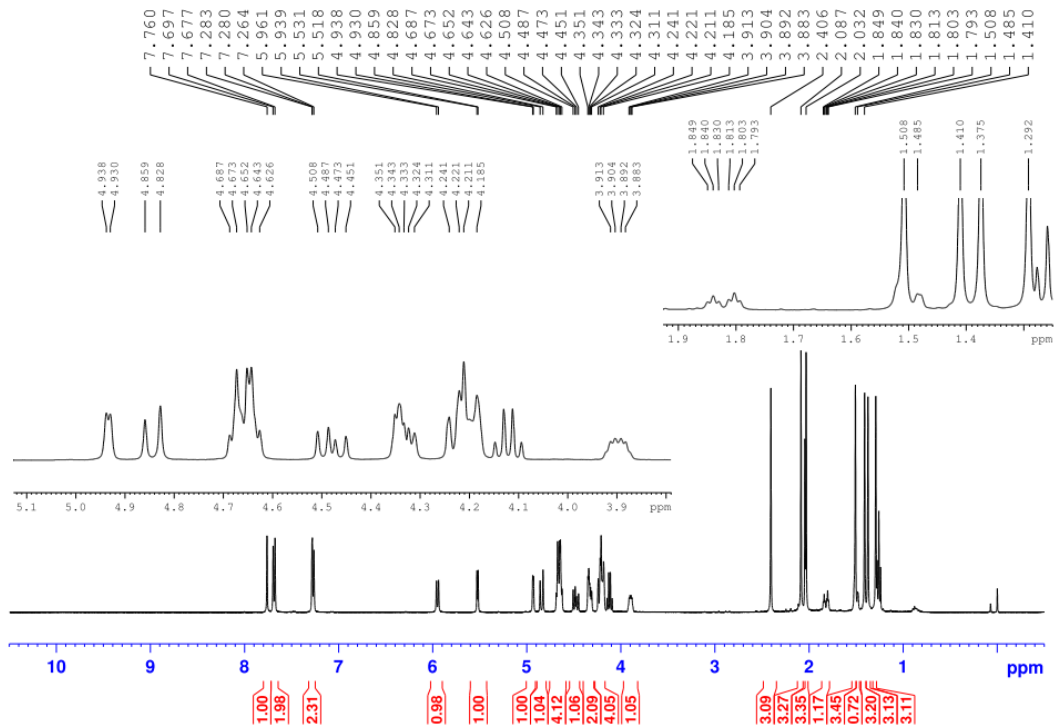

D3-030-1p, 13C Av 400 MHz CDCl3, sep11

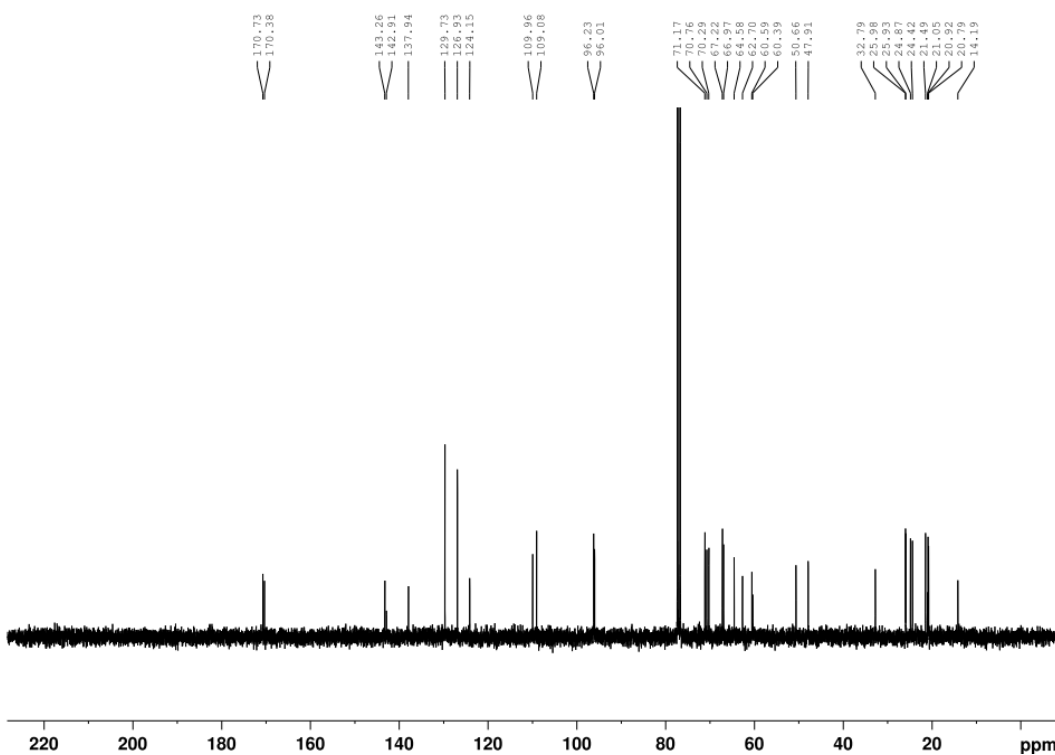

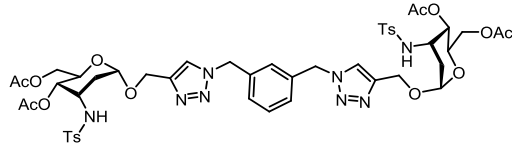

6a

D2-132-1p, <sup>1</sup>HNMR, CDCl<sub>3</sub>, AV400MHz

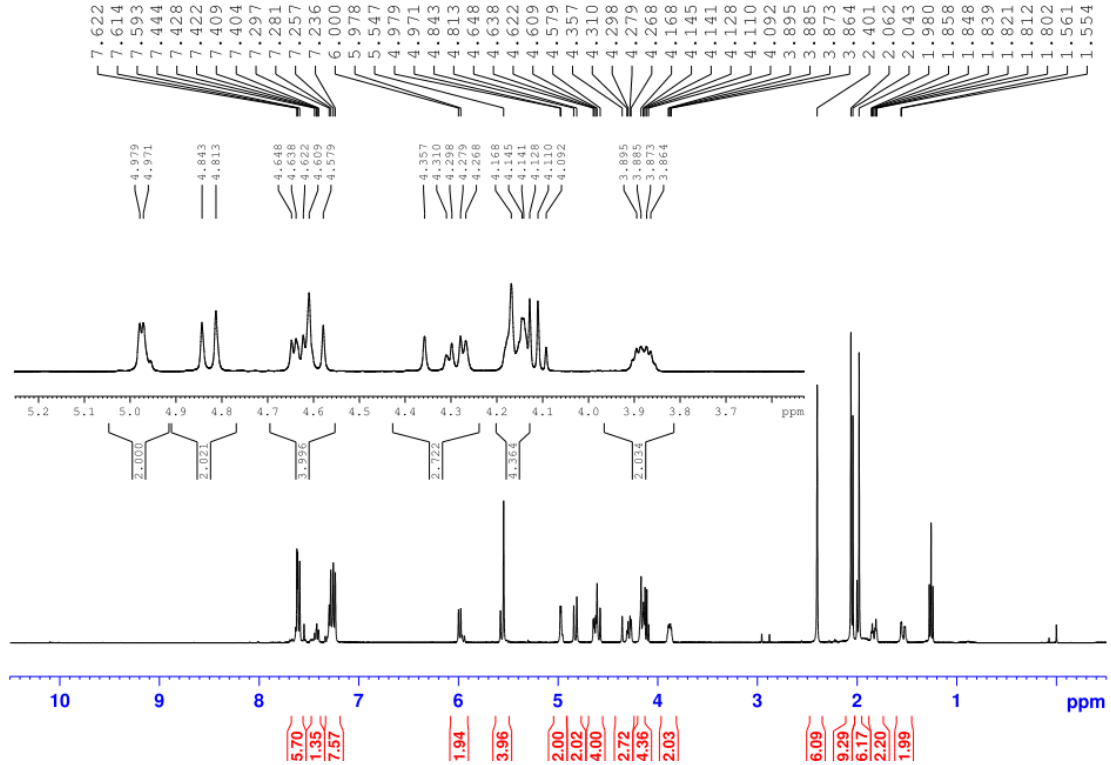

D2-132-1p, <sup>13</sup>CNMR, CDCl<sub>3</sub>, AV400MHz

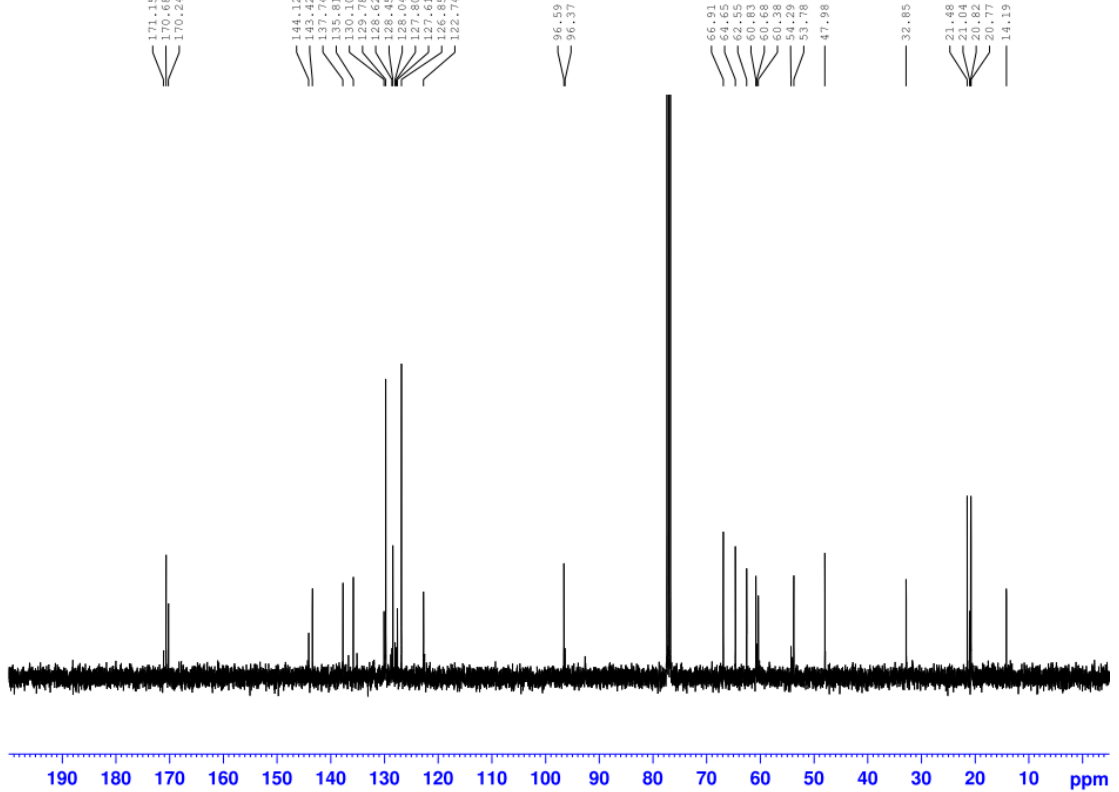

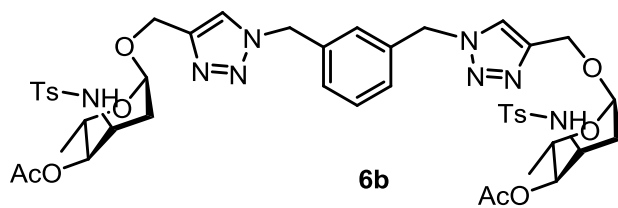

D2-131-1p, <sup>1</sup>HNMR, CDCl<sub>3</sub>, AV400MHz

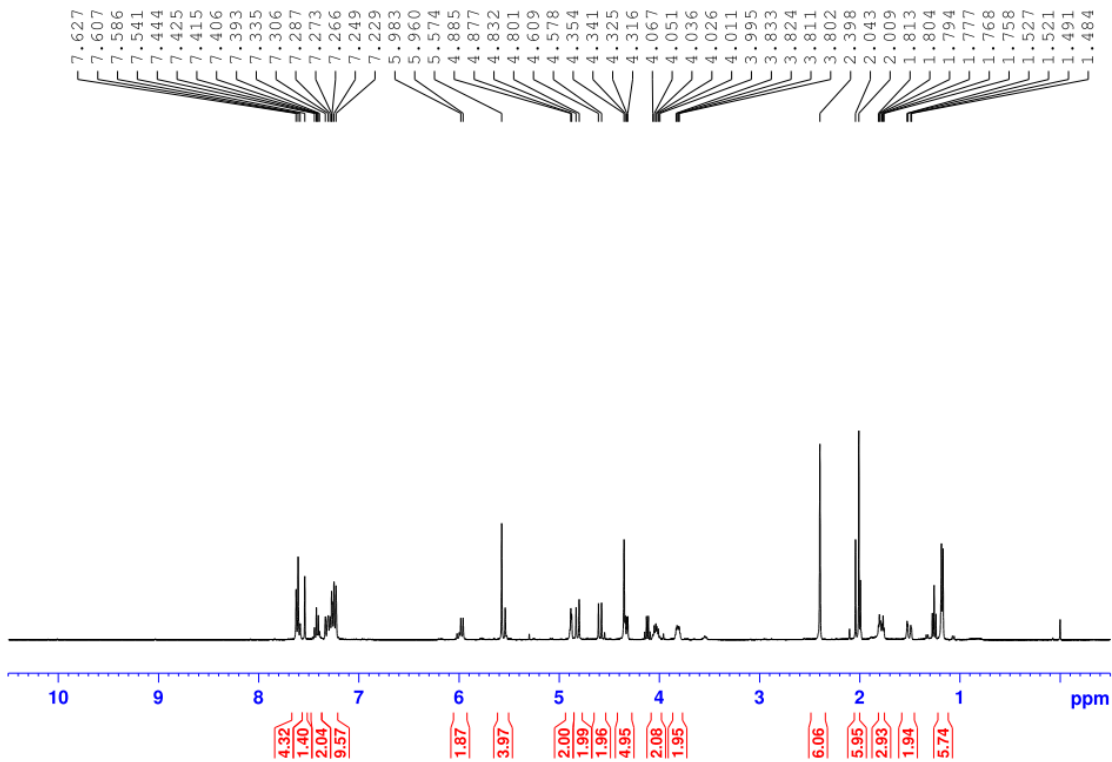

D2-131-1p, <sup>13</sup>CNMR, CDCl<sub>3</sub>, AV400MHz

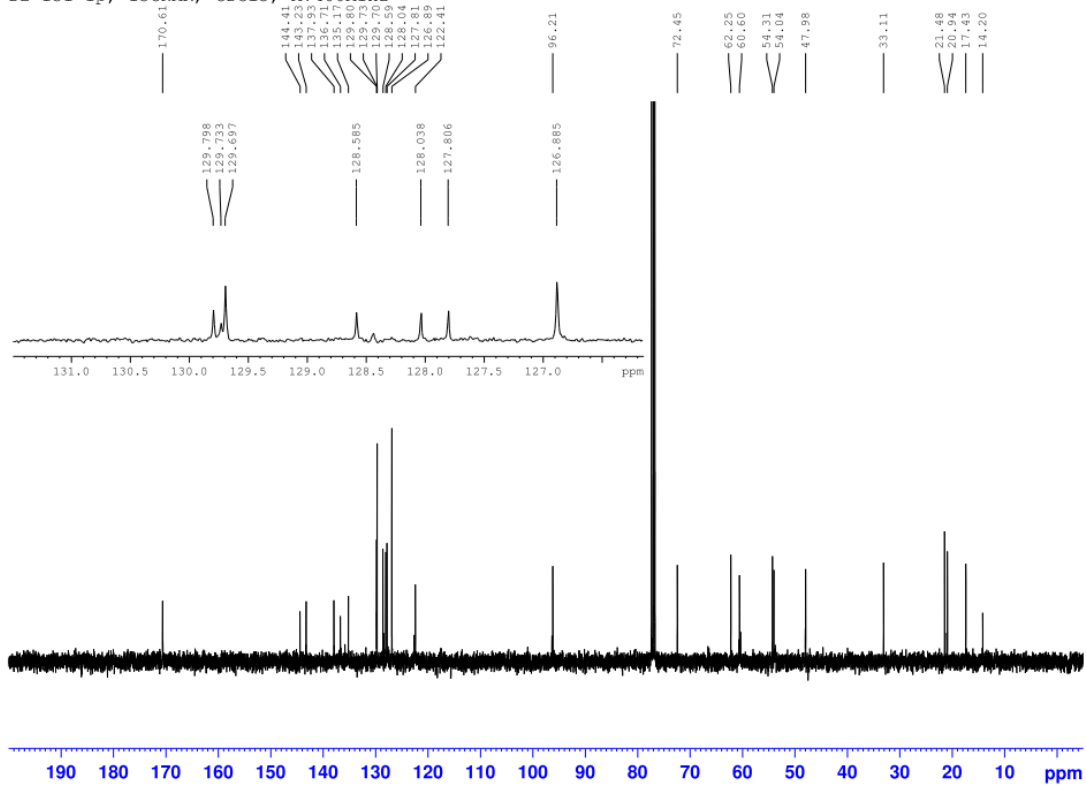

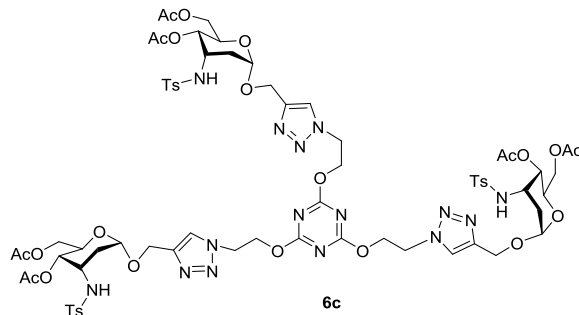

D3-018-1p, <sup>1</sup>H, BBFO1-400MHZ, AUG11, CDCl<sub>3</sub>

7.778  
7.668  
7.647  
7.288  
5.944  
5.921  
4.980  
4.972  
4.870  
4.860  
4.839  
4.829  
4.651  
4.642  
4.620  
4.575  
4.563  
4.549  
4.331  
4.320  
4.301  
4.289  
4.204  
4.192  
4.175  
3.892  
3.884  
3.871  
3.862  
3.658  
3.645  
3.632  
2.406  
2.007  
1.866  
1.856  
1.846  
1.829  
1.819  
1.809  
1.562  
1.555

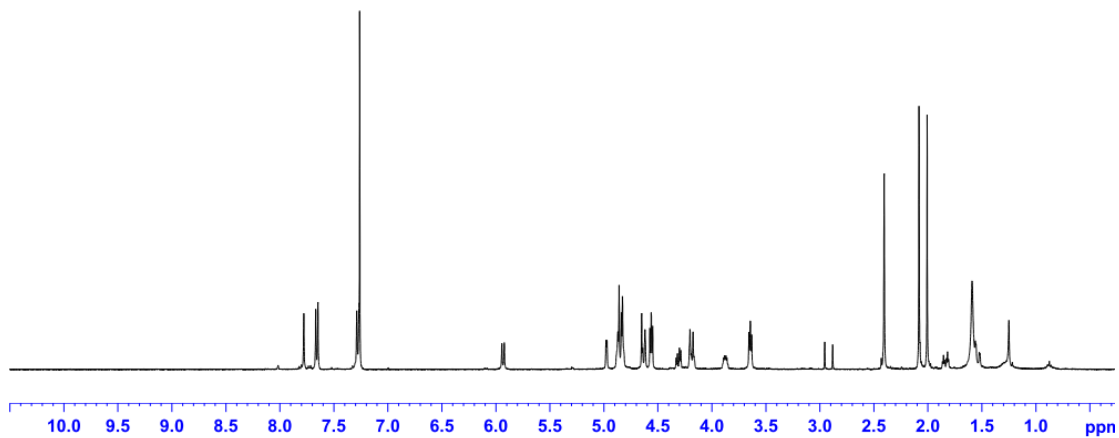

0.93  
1.73  
1.74  
1.00  
0.95  
4.17  
1.82  
1.75  
1.02  
1.89  
1.01  
1.87  
3.05  
3.02  
2.84  
1.01  
1.39

D3-018-1p, <sup>13</sup>C, BBFO1-400MHZ, AUG11, CDCl<sub>3</sub>

173.06  
171.84  
171.55  
170.75  
170.37  
143.40  
137.71  
129.79  
126.94  
96.39  
67.64  
66.95  
66.92  
64.64  
62.55  
62.55  
49.39  
48.92  
47.90  
32.84  
21.90  
21.89  
20.81

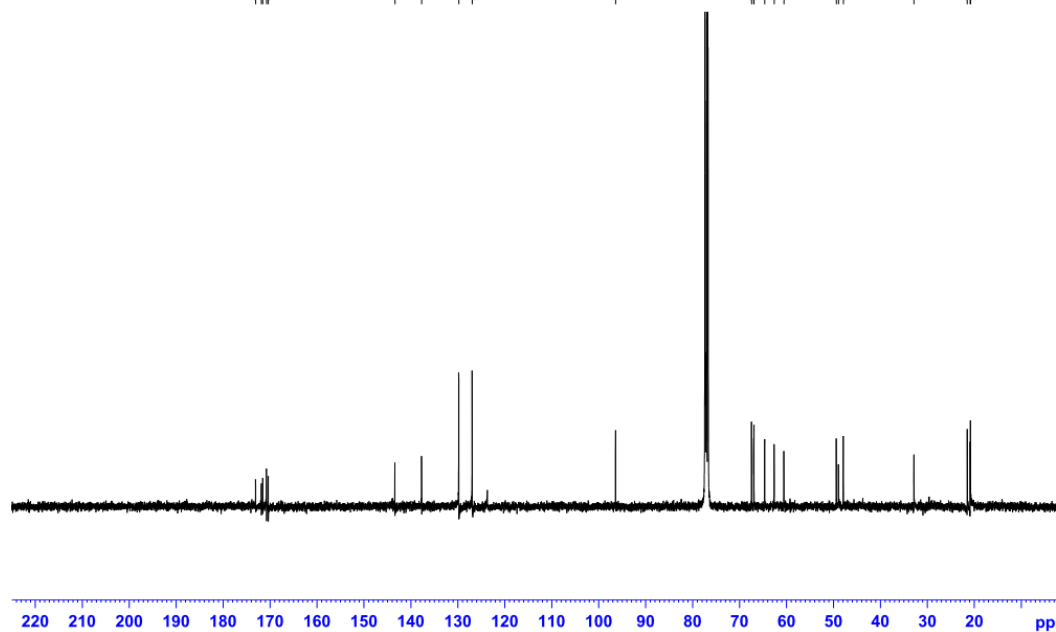

Supplement: Additional file 1 [file 1860-5397-10-134-S1.pdf]
